# Supplementary material for: Male-biased Cyp17a2 orchestrates antiviral sexual dimorphism in fish via STING stabilization and viral protein degradation
Source: eLife journal article supplement (doi:10.7554/elife.108048), 2025-09-10
Supplement: fig6-data1 [file elife-108048-fig6-data1-v1.pdf]

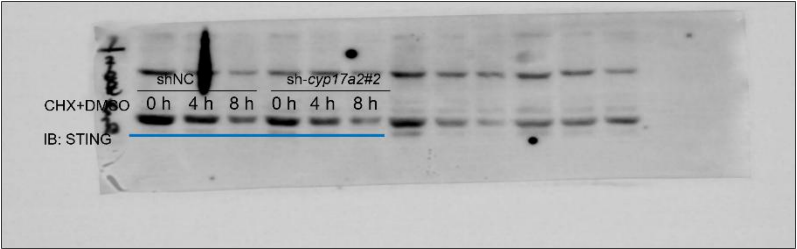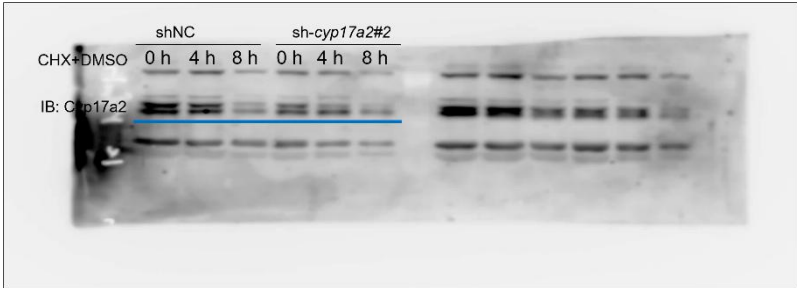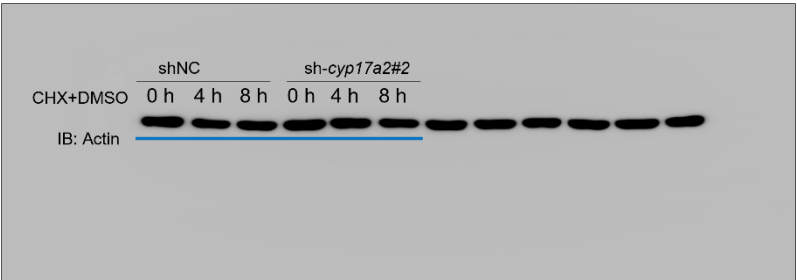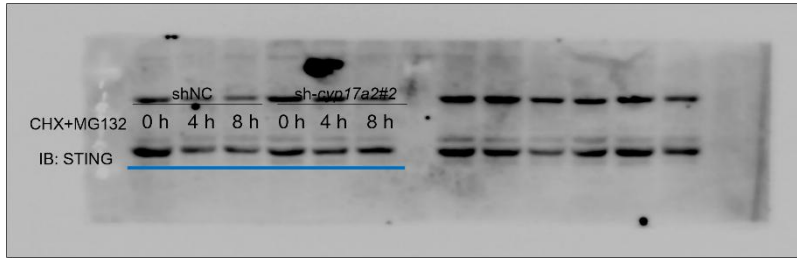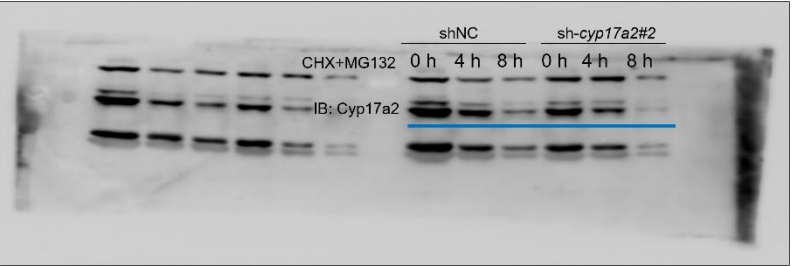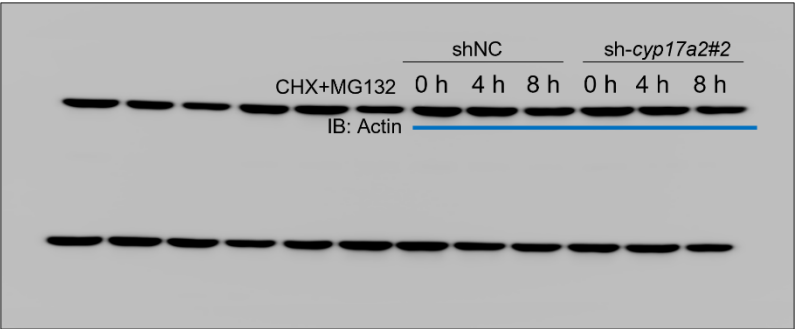

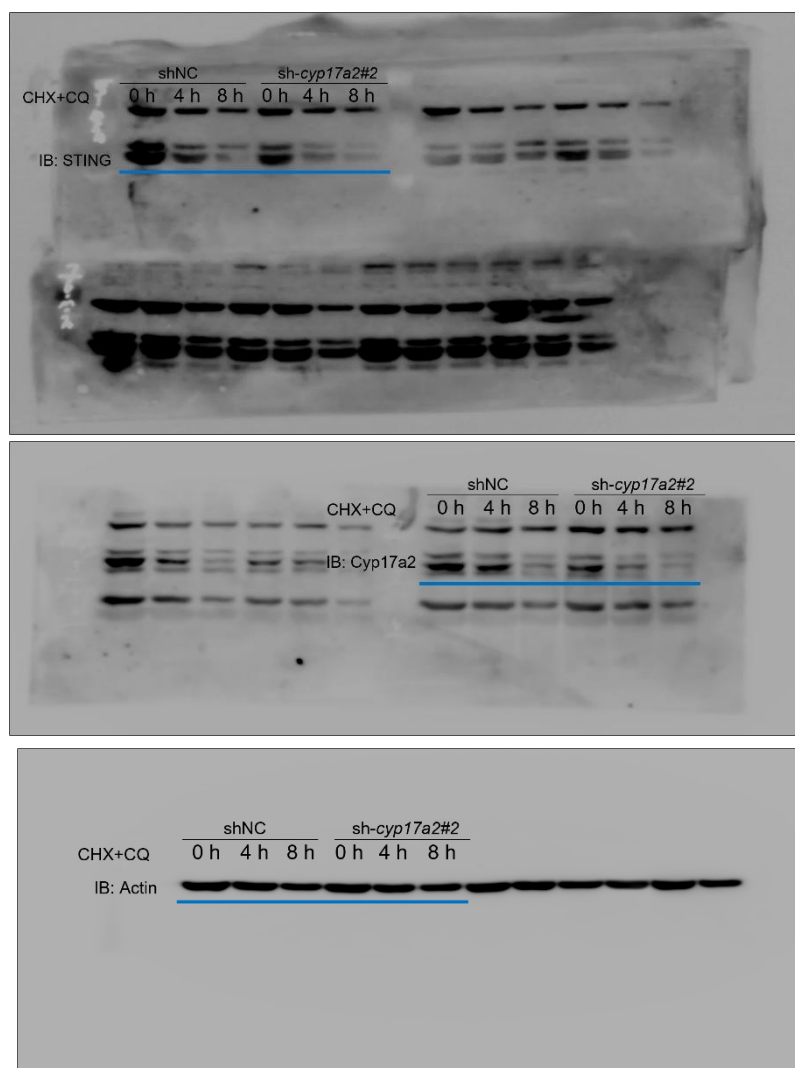

Figure 6, Source Data 1. Original membranes corresponding to Figure 6, panel A. Each membrane is labelled with the relevant information. The blue lines indicate the corresponding bands.

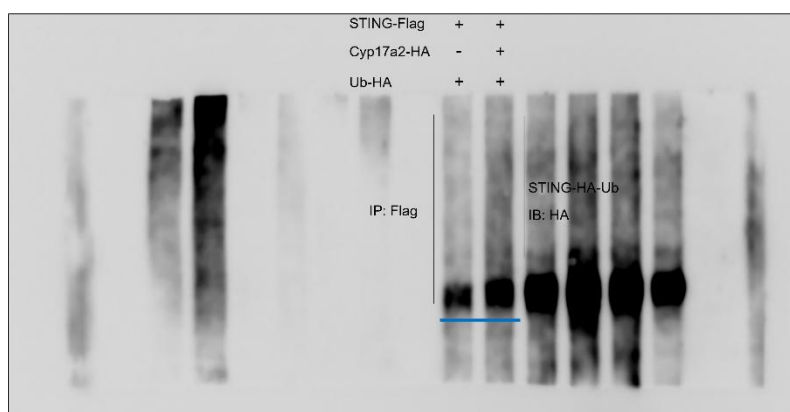

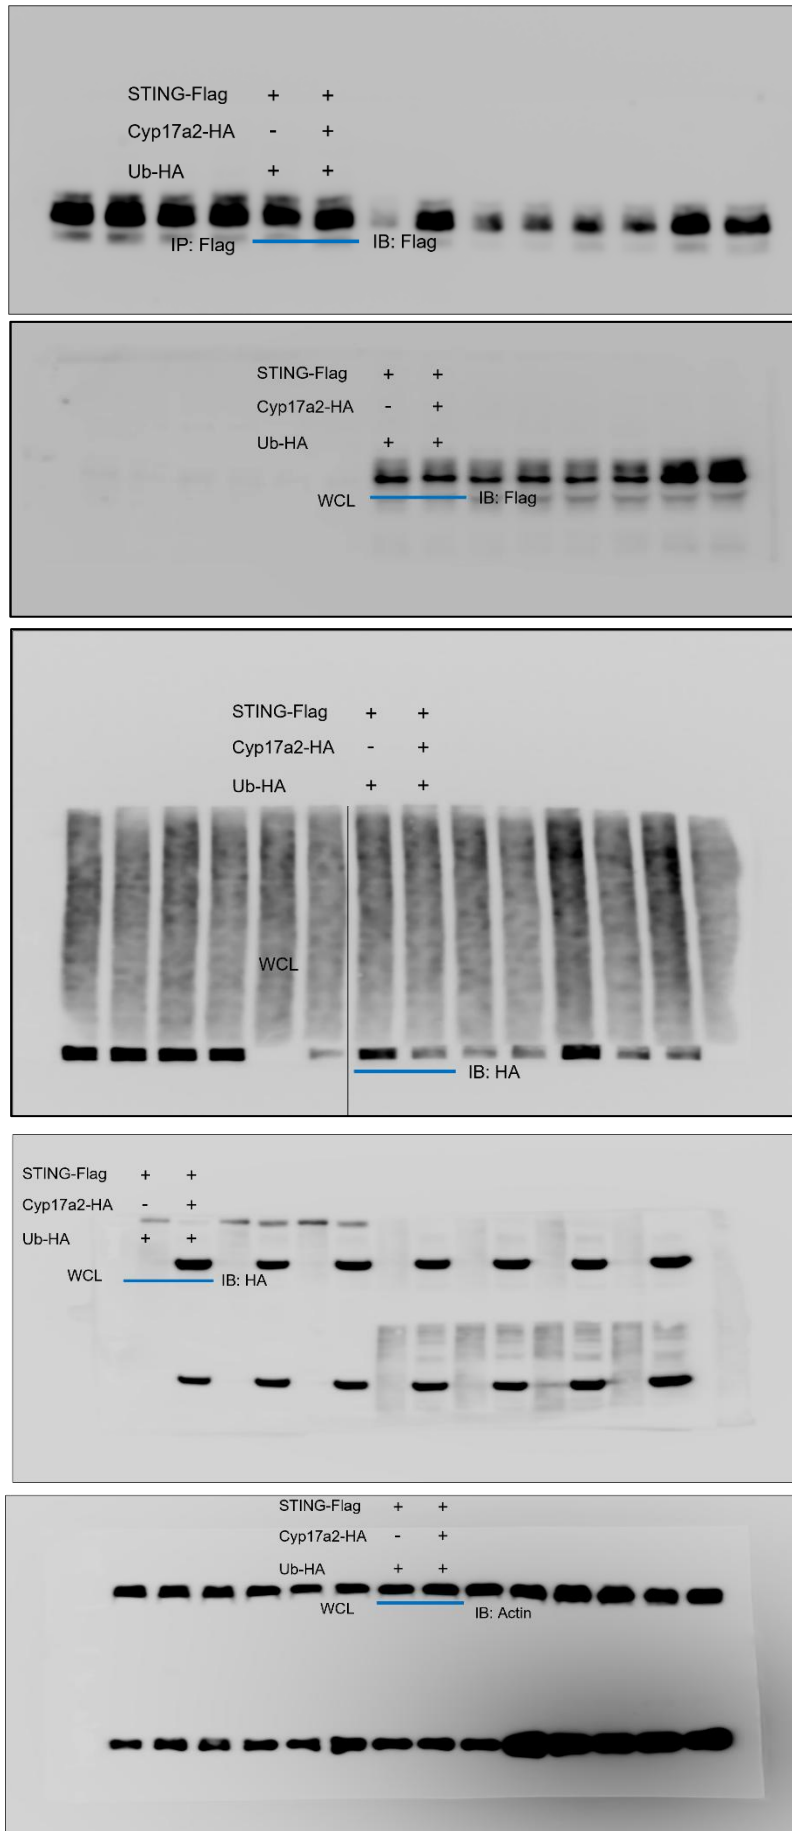

Figure 6, Source Data 1. Original membranes corresponding to Figure 6, panel B. Each

membrane is labelled with the relevant information. The blue lines indicate the corresponding bands.

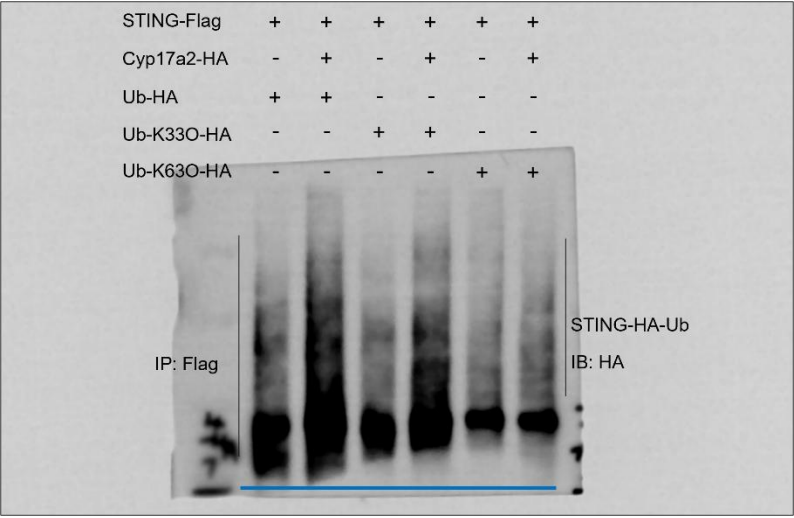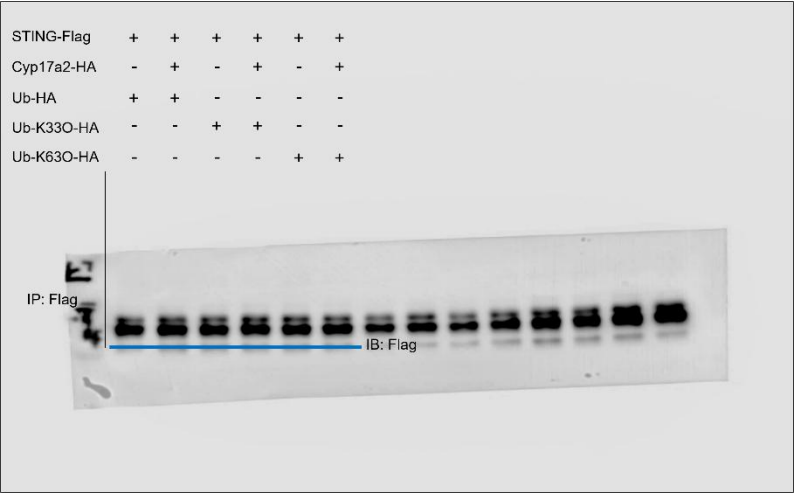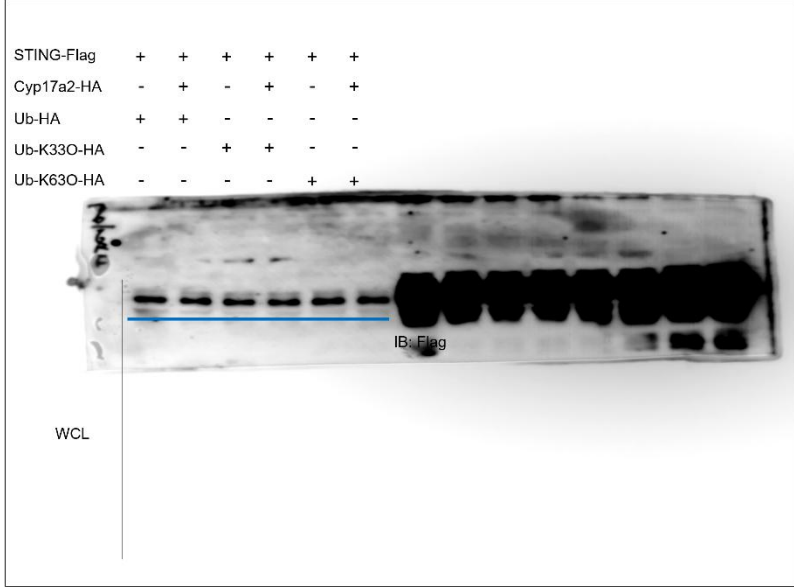

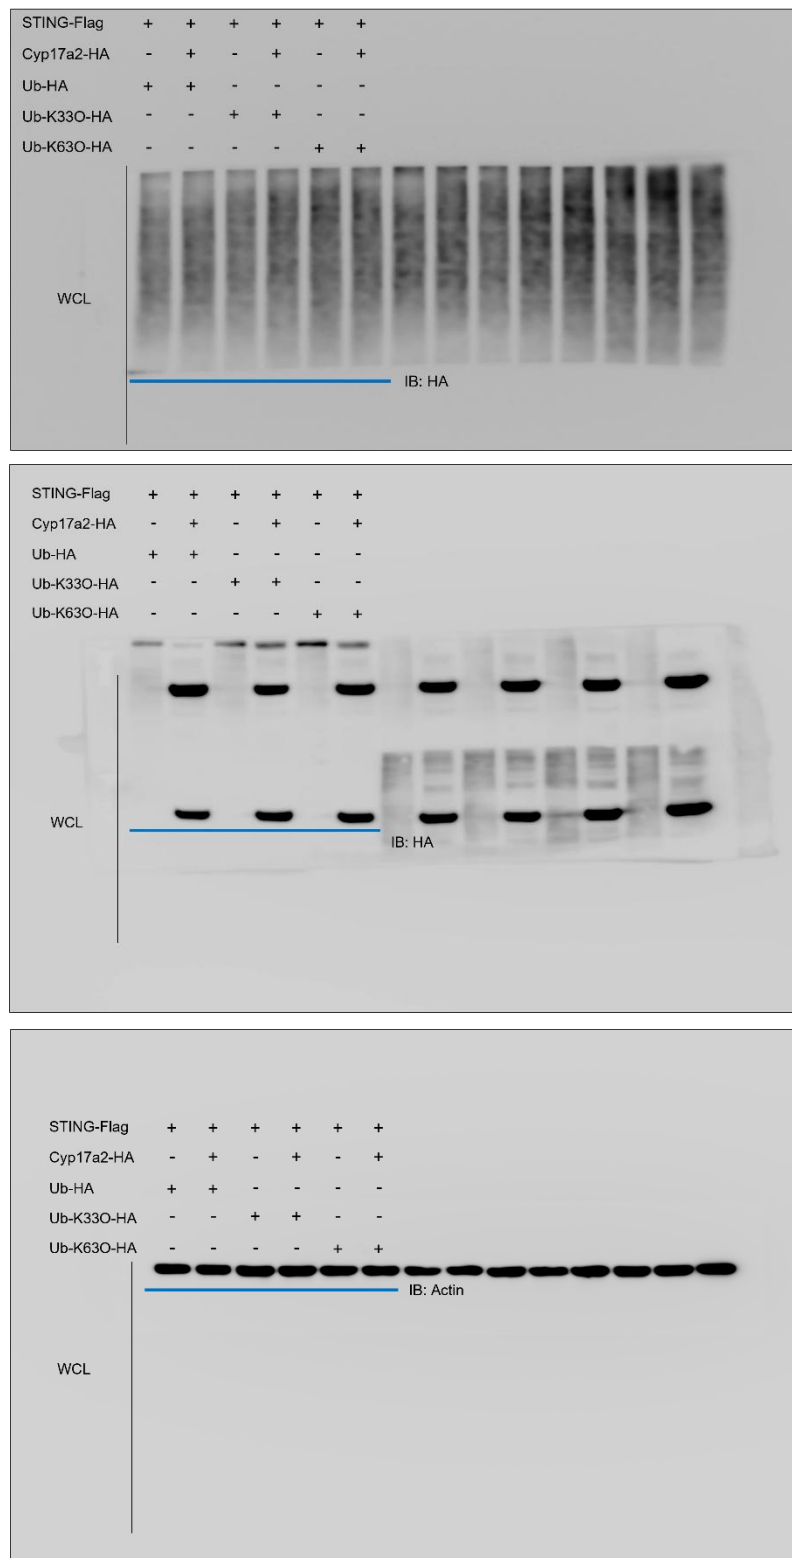

Figure 6, Source Data 1. Original membranes corresponding to Figure 6, panel C. Each membrane is labelled with the relevant information. The blue lines indicate the corresponding bands.

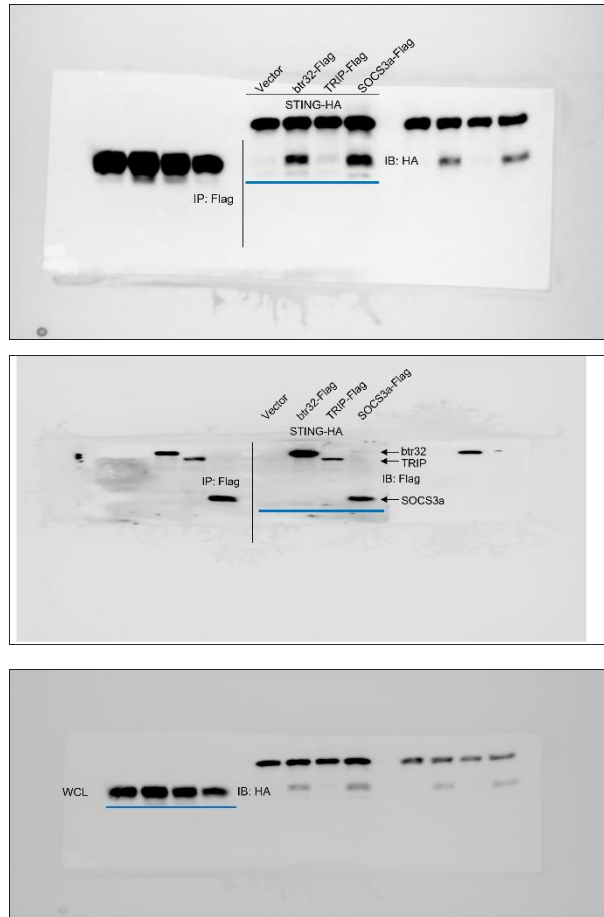

Figure 6, Source Data 1. Original membranes corresponding to Figure 6, panel D. Each membrane is labelled with the relevant information. The blue lines indicate the corresponding bands.

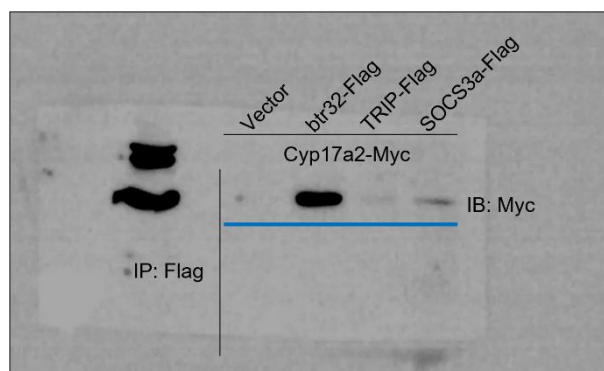

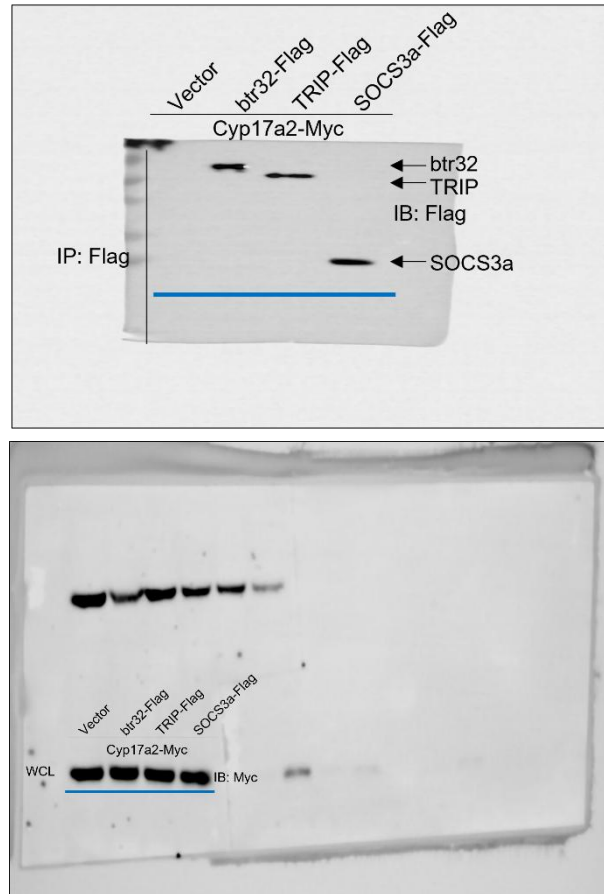

Figure 6, Source Data 1. Original membranes corresponding to Figure 6, panel E. Each membrane is labelled with the relevant information. The blue lines indicate the corresponding bands.

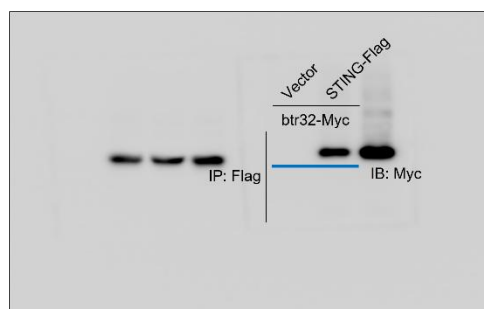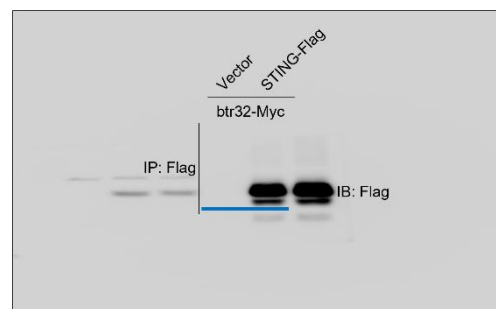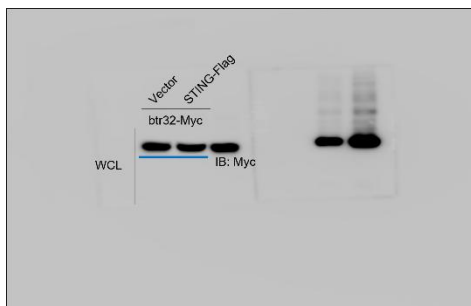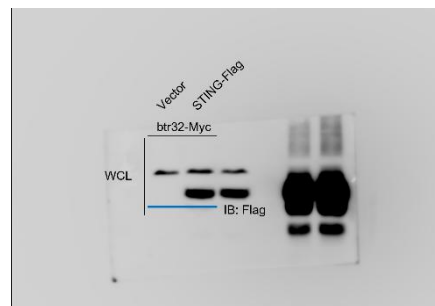

Figure 6, Source Data 1. Original membranes corresponding to Figure 6, panel F. Each membrane is labelled with the relevant information. The blue lines indicate the corresponding bands.

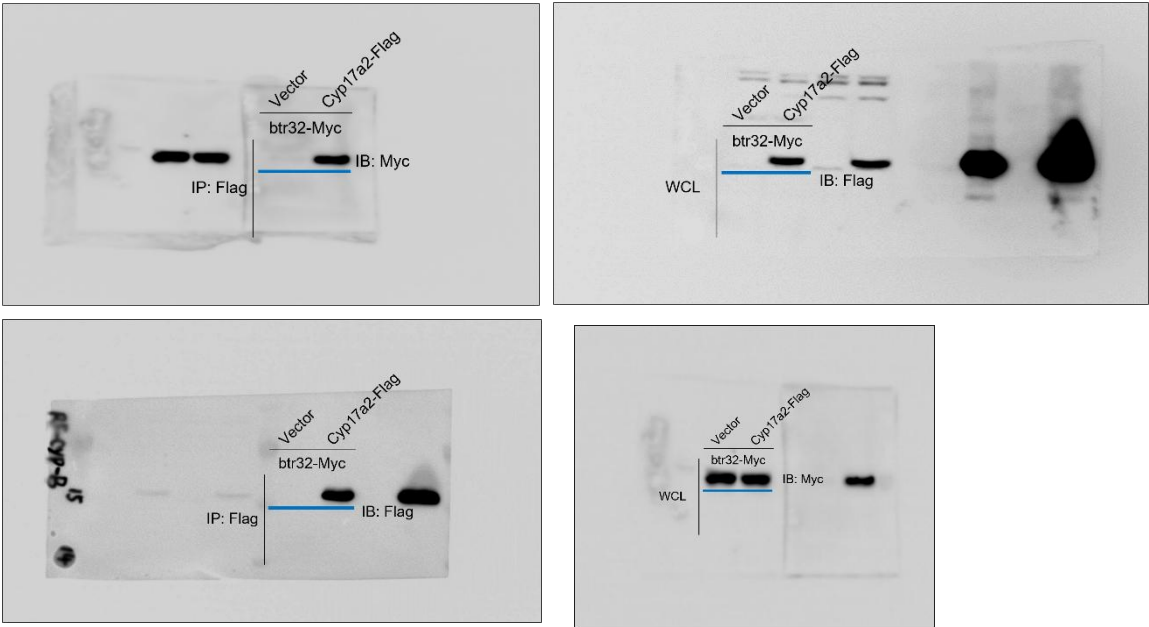

Figure 6, Source Data 1. Original membranes corresponding to Figure 6, panel G. Each membrane is labelled with the relevant information. The blue lines indicate the corresponding bands.

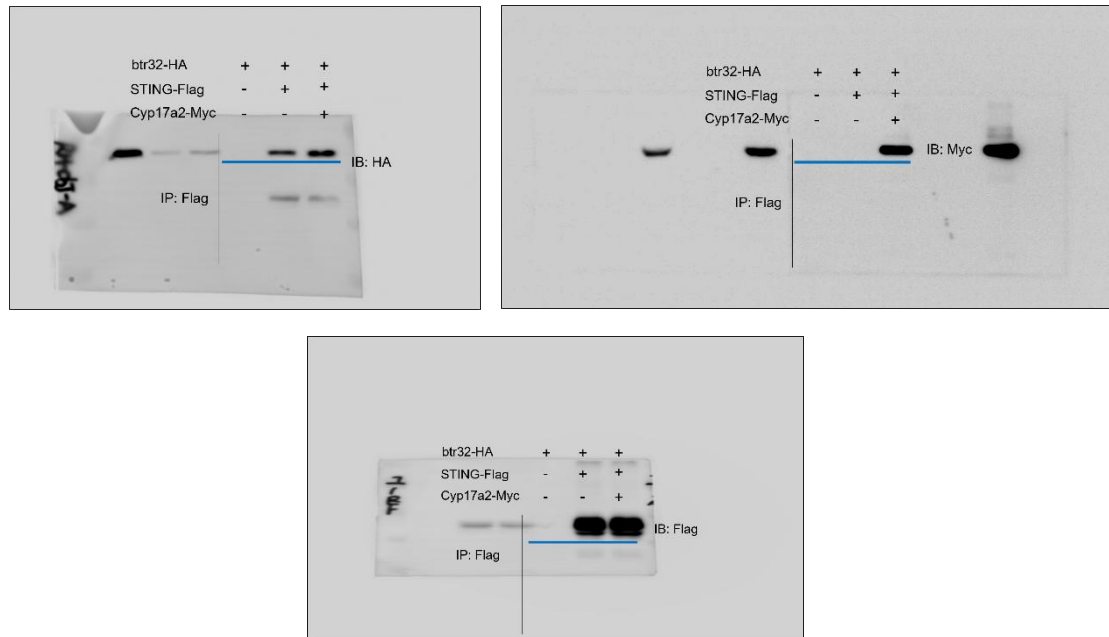



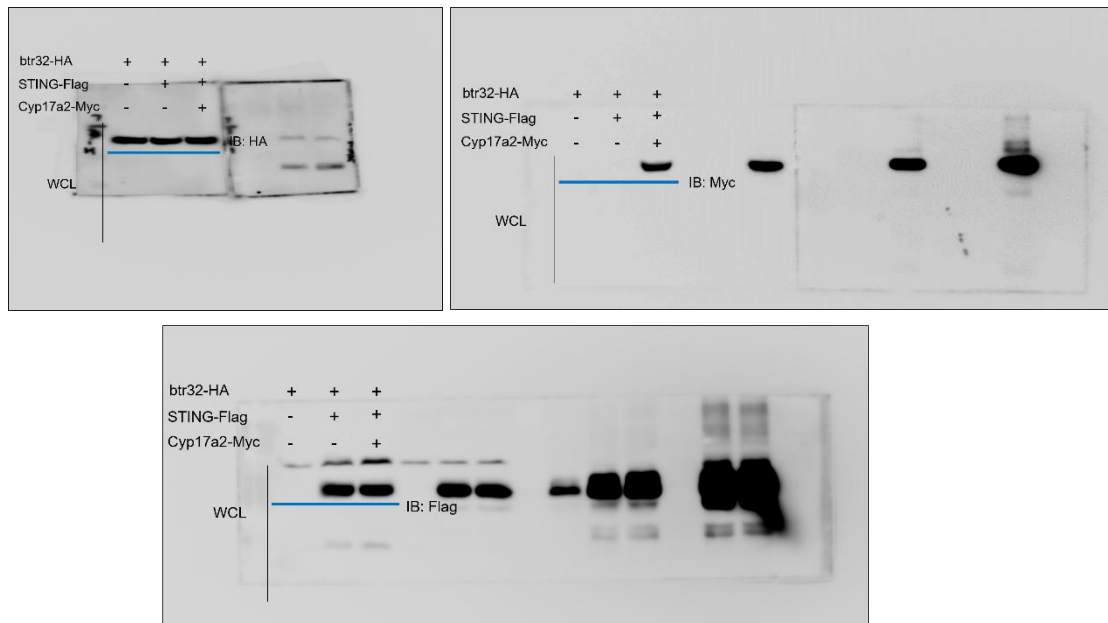

Figure 6, Source Data 1. Original membranes corresponding to Figure 6, panel K. Each membrane is labelled with the relevant information. The blue lines indicate the corresponding bands.

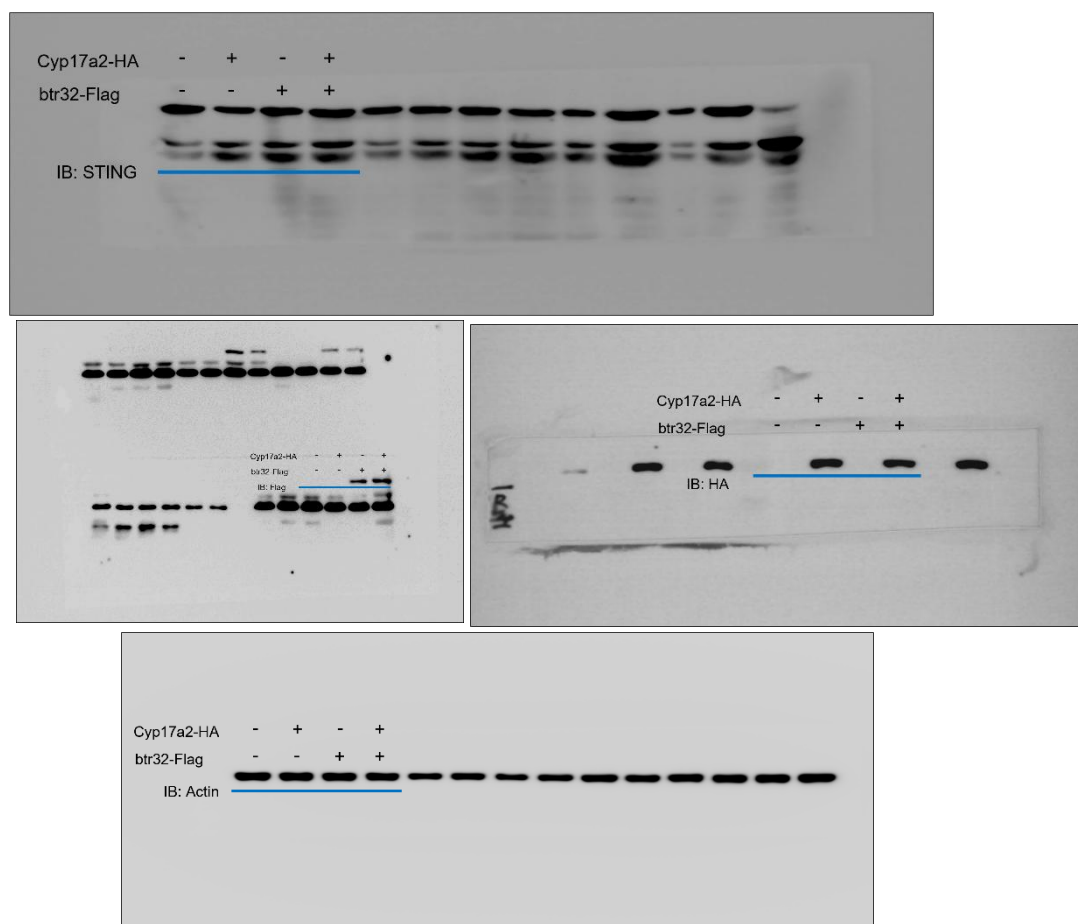

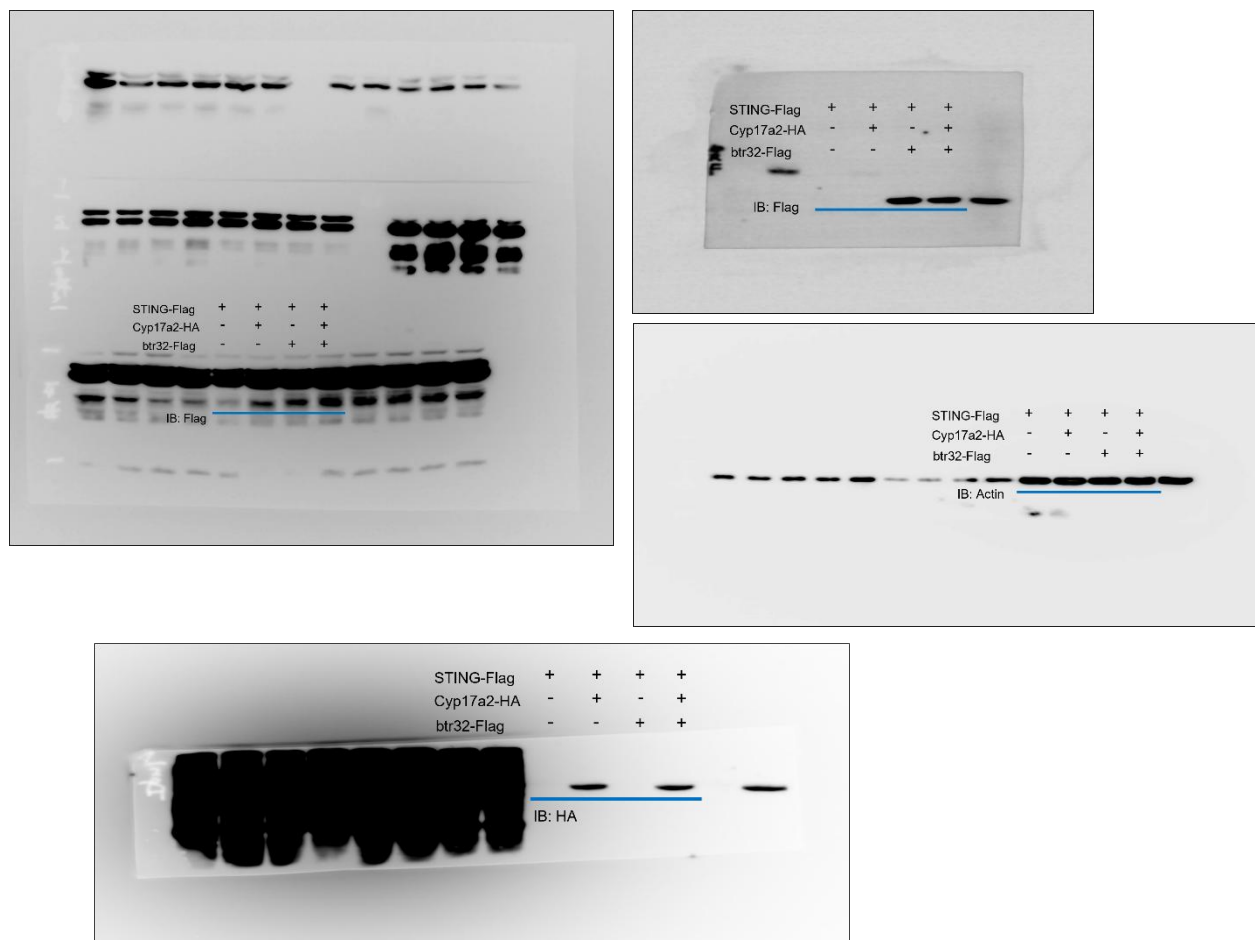

Figure 6, Source Data 1. Original membranes corresponding to Figure 6, panel N. Each membrane is labelled with the relevant information. The blue lines indicate the corresponding bands.
