# Supplementary material for: Male-biased Cyp17a2 orchestrates antiviral sexual dimorphism in fish via STING stabilization and viral protein degradation
Source: eLife journal article supplement (doi:10.7554/elife.108048), 2025-09-10
Supplement: fig9-figsupp1-data1 [file elife-108048-fig9-figsupp1-data1-v1.pdf]

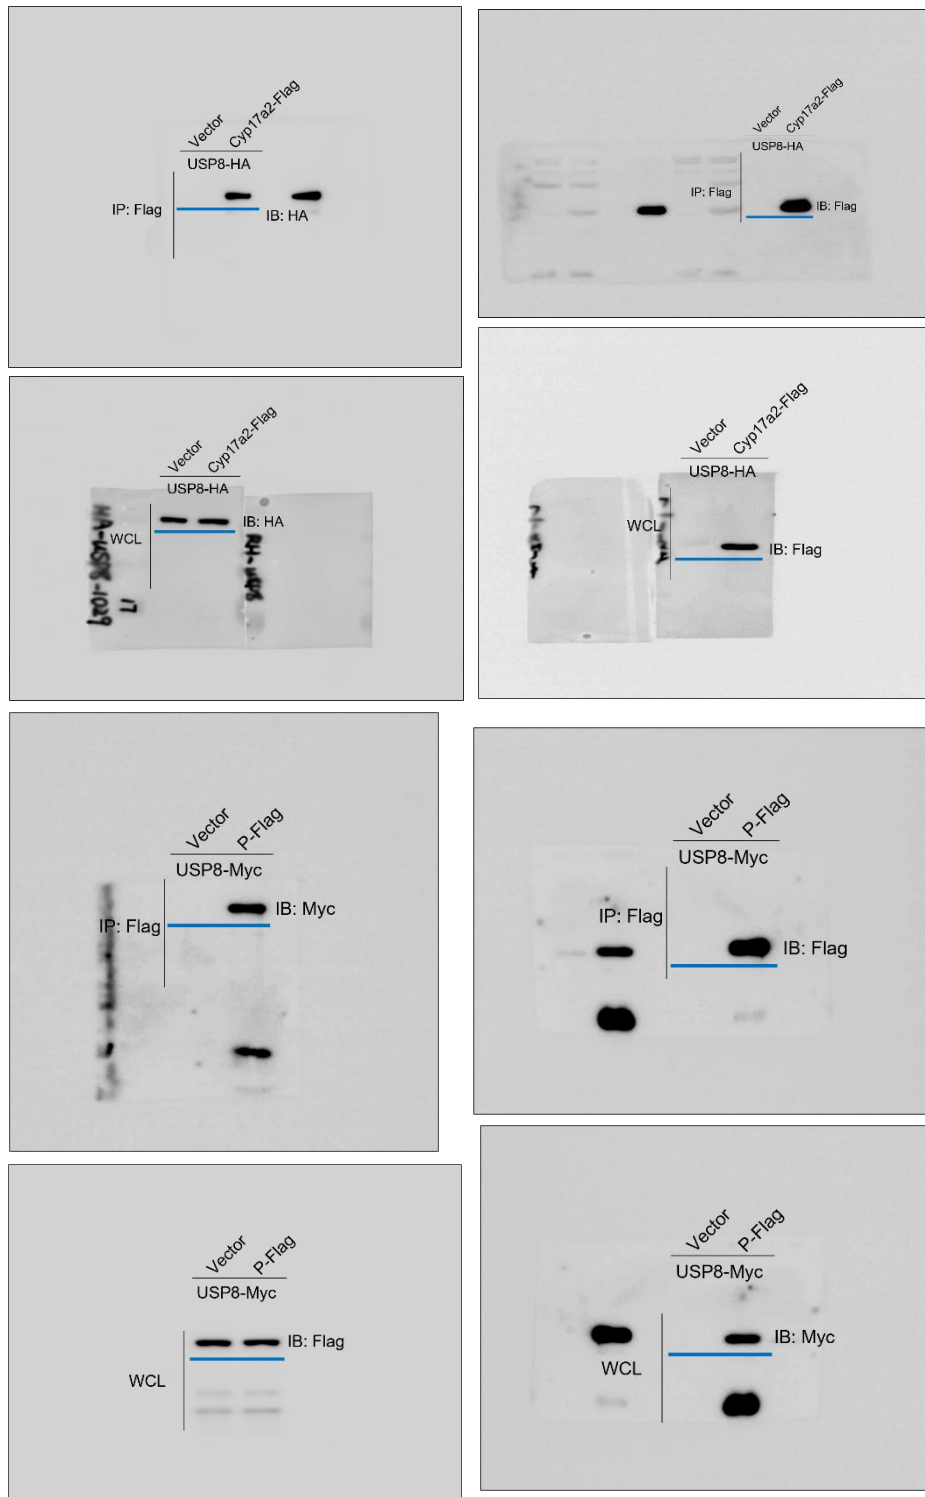

Figure 9-figure supplement 1, Source Data 1. Original membranes corresponding to Figure 9-figure supplement 1, panel A. Each membrane is labelled with the relevant information. The blue lines indicate the corresponding bands.

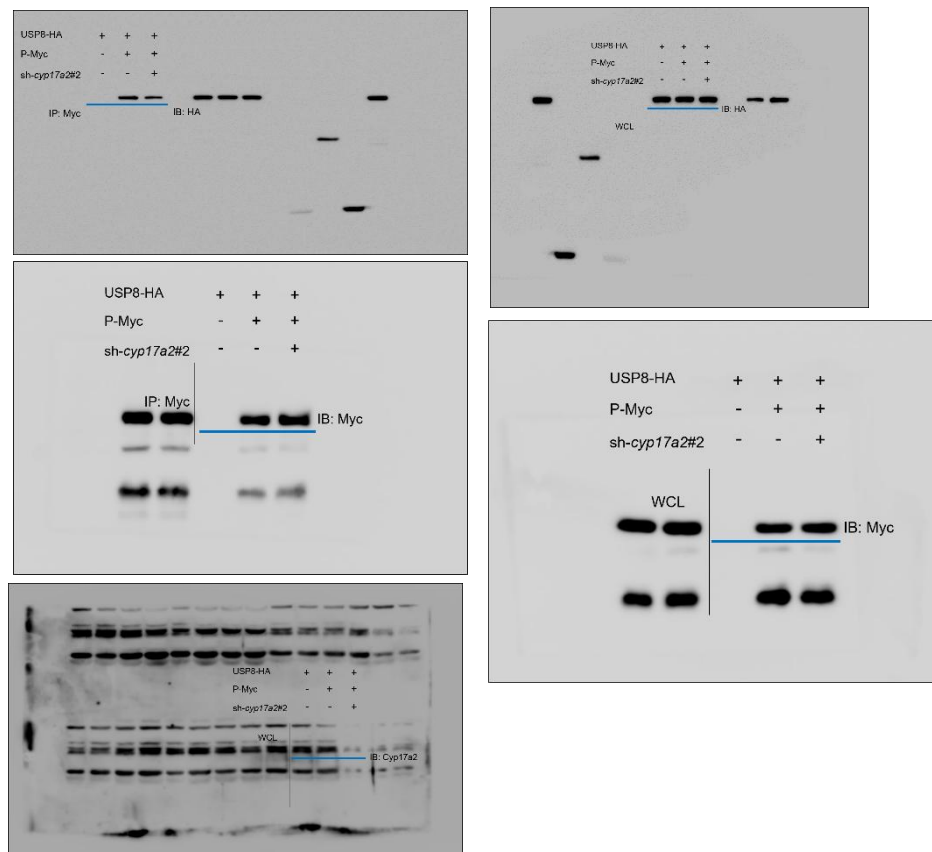

Figure 9-figure supplement 1, Source Data 1. Original membranes corresponding to Figure 9-figure supplement 1, panel C. Each membrane is labelled with the relevant information. The blue lines indicate the corresponding bands.

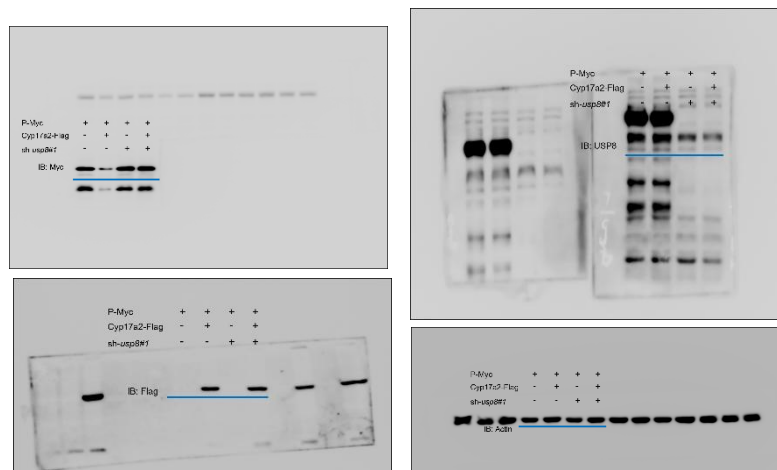

Figure 9-figure supplement 1, Source Data 1. Original membranes corresponding to Figure 9-figure supplement 1, panel D. Each membrane is labelled with the relevant information. The blue lines indicate the corresponding bands.

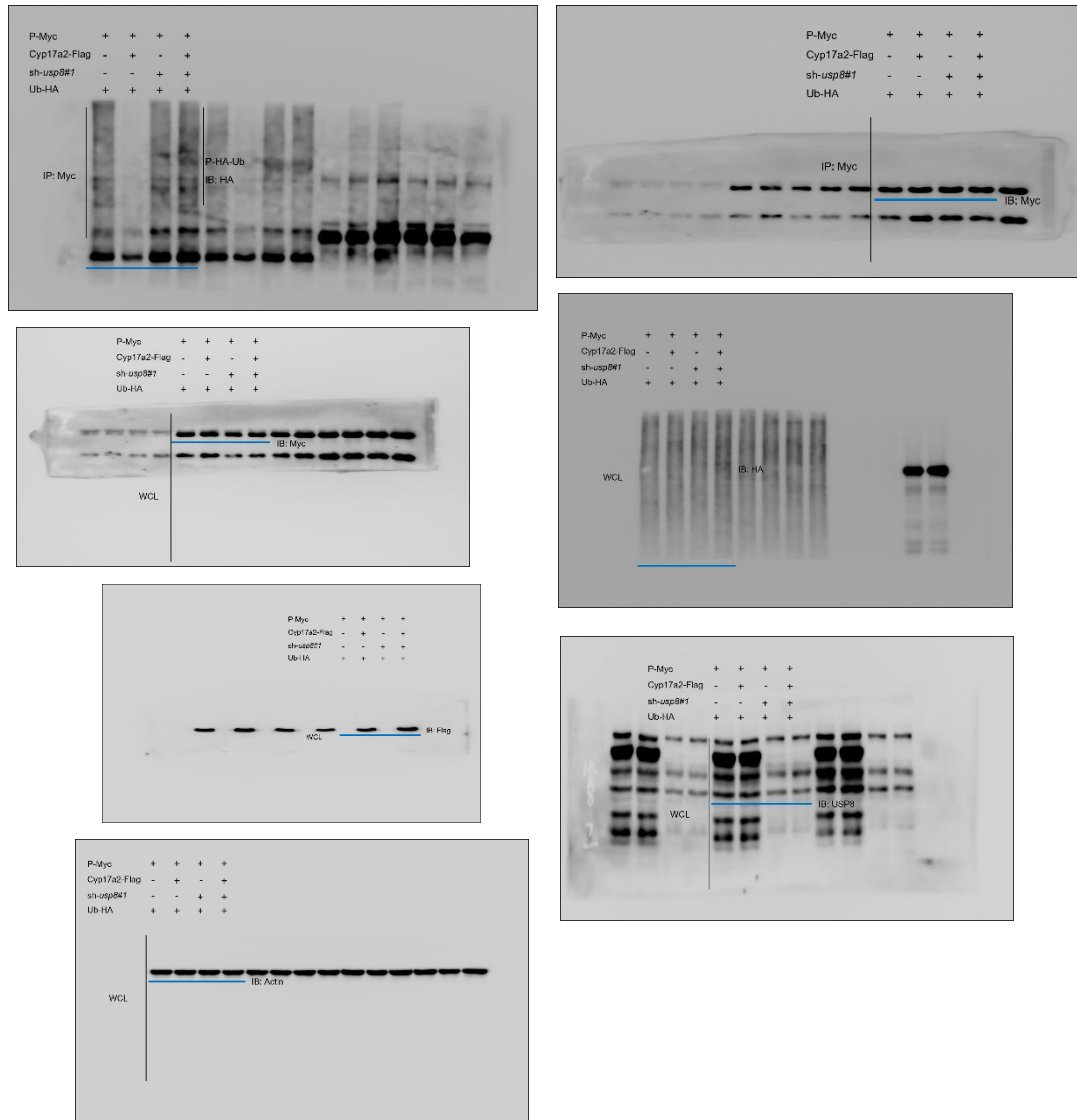

Figure 9-figure supplement 1, Source Data 1. Original membranes corresponding to Figure 9-figure supplement 1, panel E. Each membrane is labelled with the relevant information. The blue lines indicate the corresponding bands.

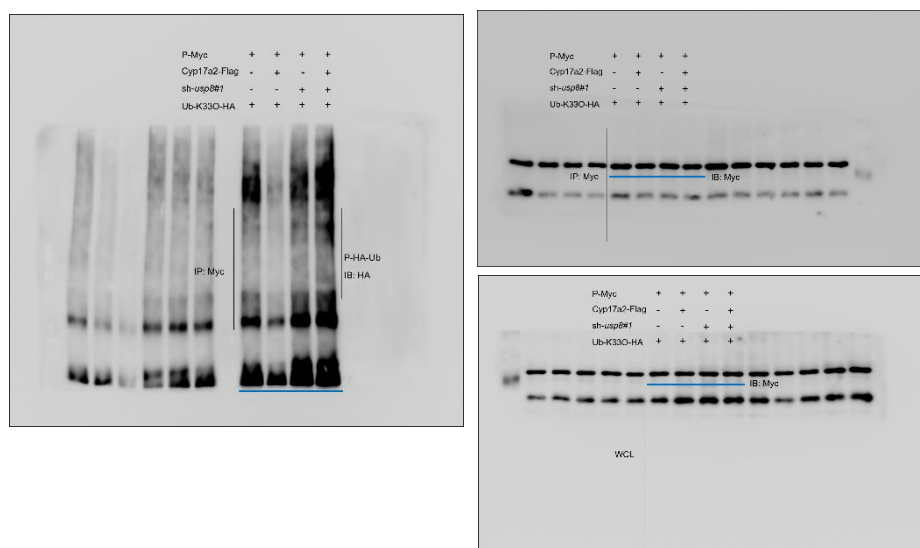

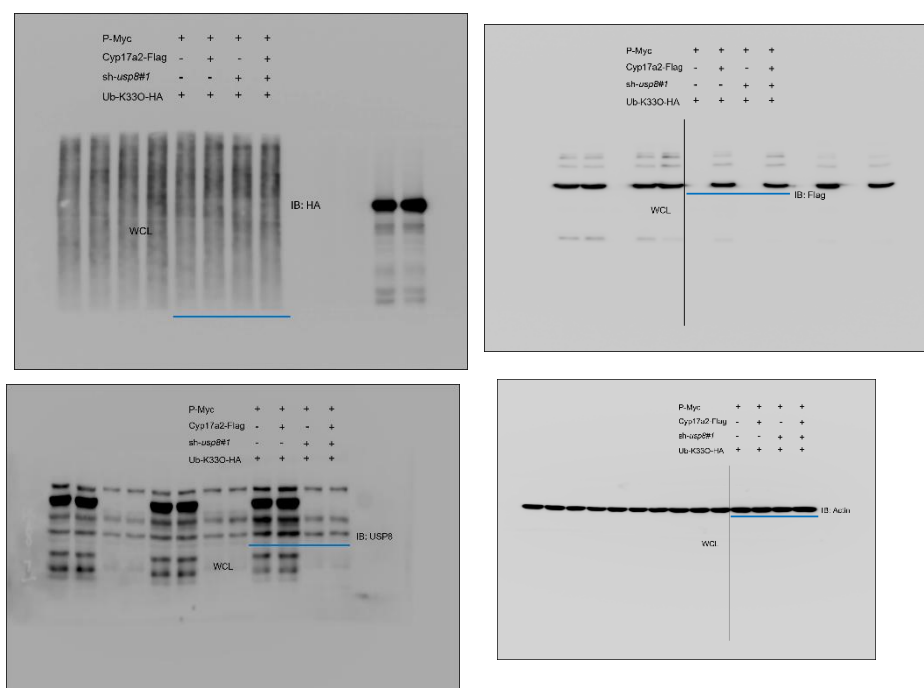

Figure 9-figure supplement 1, Source Data 1. Original membranes corresponding to Figure 9-figure supplement 1, panel F. Each membrane is labelled with the relevant information. The blue lines indicate the corresponding bands.

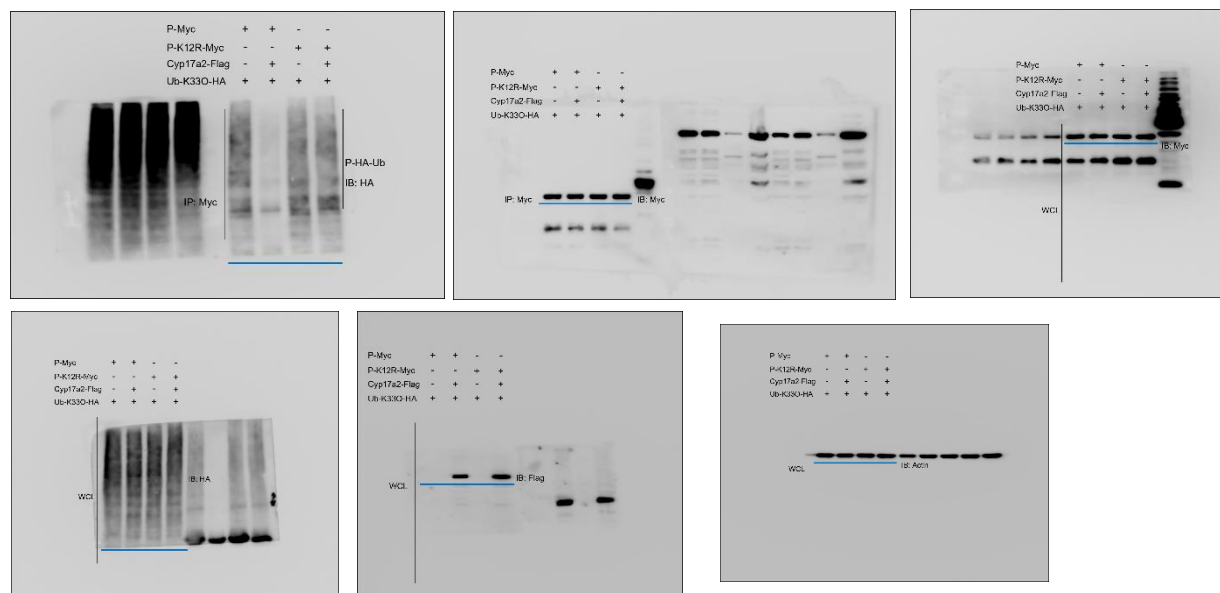

Figure 9-figure supplement 1, Source Data 1. Original membranes corresponding to Figure 9-figure supplement 1, panel G. Each membrane is labelled with the relevant information. The blue lines indicate the corresponding bands.



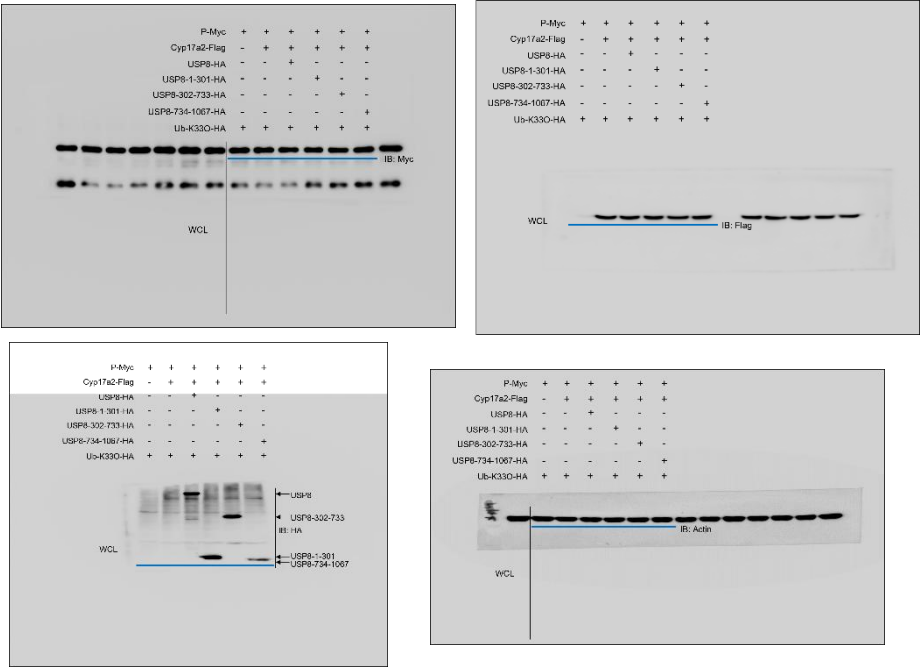

Figure 9-figure supplement 1, Source Data 1. Original membranes corresponding to Figure 9-figure supplement 1, panel I. Each membrane is labelled with the relevant information. The blue lines indicate the corresponding bands.
