# Supplementary material for: Male-biased Cyp17a2 orchestrates antiviral sexual dimorphism in fish via STING stabilization and viral protein degradation
Source: eLife. 2026 Feb 18;14:RP108048. doi: 10.7554/eLife.108048 (PMC12916102; doi:10.7554/eLife.108048)
Supplement: Figure 1—source data 3. [file elife-108048-fig1-data3.xlsx]

## Sheet: 1 A
Days	male	female
2	1
3	1
3	1
3	1
3	1
4	1
4	1
4	1
5	0
6	0
7	0
7	0
7	0
7	0
7	0
2		1
2		1
3		1
3		1
3		1
3		1
3		1
3		1
3		1
3		1
3		1
4		1
5		0
6		0
7		0
n = 15	p = 0.007

## Sheet: 1 E
Liver		n = 26	Spleen		n = 26
male	female	p < 0.0001	male	female	p < 0.0001
0.0356902	0.59096		0.264898	9.33323
2.42443	13.9809		1.63132	9.47685
0.981951	3.92781		0.0313732	2.2955
1.73047	8.99091		0.063031	2.53416
2.07831	11.5885		0.504895	3.11663
0.249251	14.0731		2.79803	4.46785
0.631681	5.90636		0.0556941	6.25604
0.11273	17.0608		0.409619	30.406
2.08837	4.93013		0.00231456	2.0997
1.48277	8.13397		0.0167624	1.54164
0.0324033	4.47397		0.00131894	5.99194
0.200024	1.99687		0.135679	3.47969
0.414423	2.86854		2.30387	14.3479
3.01771	2.42e-10		0.0665684	20.9909
1.85256	20.5291		3.49258	2.27e-08
0.144721	26.4892		2.27035	5.66989
1.82169	23.1453		0.467745	16.5825
0.1934	22.096		3.99094	1.99988
0.336194	16.6047		0.180633	4.89978
0.994276	4.85349		2.77e-05	5.25551
0.896148	12.2869		0.87347	20.2463
3.15659	3.60213		0.0701511	6.79576
1.32416	5.90059		1.87292	1.10799
0.212013	11.6709		0.793354	12.0542
0.82644	2.47135		0.397839	2.09384
0.964913	21.573		0.259047	6.46435

## Sheet: 1 G
male																																												female
1.19	1.19	1.19	2.15	1.67	0.72	2.15	2.15	1.19	1.19	1.67	0.72	0.72	1.67	1.19	1.63	1.67	1.63	1.13	0.72	0.72	0.72	0.72	1.67	1.13	2.13	1.19	1.63	1.67	1.67	1.67	1.19	1.19	1.67	0.72	0.72	2.13	0.72	0.72	0.72					1.72	1.72	1.67	1.19	2.19	1.72
n = 40
p = 0.0002
[truncated: 34 more columns]
