# Supplementary material for: Male-biased Cyp17a2 orchestrates antiviral sexual dimorphism in fish via STING stabilization and viral protein degradation
Source: eLife. 2026 Feb 18;14:RP108048. doi: 10.7554/eLife.108048 (PMC12916102; doi:10.7554/eLife.108048)
Supplement: Figure 2—figure supplement 1—source data 3. [file elife-108048-fig2-figsupp1-data3.xlsx]

## Sheet: 1A
female	male
0.00050509	0.00203742	n = 50	p < 0.0001
0.00039081	0.00039093
0.00043248	0.00131416
0.00030247	0.000884022
0.00041556	0.00101175
0.00051337	0.00223505
0.00025262	0.00106214
0.00019227	0.00366863
0.0006238	0.00094211
6.9878e-05	0.00019752
0.000337576	0.00117753
0.000112326	0.000794661
0.000505916	0.00155633
0.000354894	0.0016911
0.000317253	0.000938394
0.000183279	0.000555593
0.000169405	0.00053993
0.000413934	0.00099579
6.31775e-05	0.00346254
0.00047657	0.000705626
0.000857263	0.000796518
0.000569124	0.000507506
0.000154923	0.000401571
0.000330439	0.000848722
0.000252398	0.000683755
0.000292982	0.000736079
0.000348924	0.00113861
0.00040831	0.0036428
0.000111051	0.00153186
7.94567e-05	0.00123847
0.000981638	0.0075812
0.000547591	0.00172469
0.00200298	0.00220165
0.000303713	0.000787455
0.000481783	0.00220824
0.000312956	0.0025159
0.00095685	0.0126623
0.00050238	0.00353179
0.000228447	0.00380366
0.000454403	0.00539421
0.000216053	0.00948373
0.000326005	0.00705736
0.00211327	0.0021526
0.00248217	0.0042057
0.000825043	0.00133296
0.00278649	0.00208173
0.000488347	0.00172048
0.000212527	0.00955851
0.00146155	0.00472375
0.000554252	0.00204788

## Sheet: 1B
ZF4 cells
0 h	1	0.09562
12 h	1.25398	0.06974
24 h	2.56274	0.15744	p = 0.0125853706833936
48 h	3.91359	0.139507	p = 0.00479429487127225
72 h	3.98479	0.18761	p = 0.00980707546692408
EPC cells
0 h	1	0.1309
6 h	1.043	0.21762
12 h	1.26646	0.1012
24 h	1.40406	0.15009
48 h	4.01147	0.29313	p = 0.0171310178113594

## Sheet: 1F
cyp17a2+/+															cyp17a2-/-
0.72	0.72	0.72	0.72	0.72	0.72	0.72	0.72	0.72	0.72	0.72	1.19	1.67	1.67	1.67	1.5	1.74	1.5	1.5	1.5	1.5	1.5	1.74	1.74	1.74	1.74	1.74	1.74	2.19	2.39
n = 15	p < 0.0001
