# Supplementary material for: Male-biased Cyp17a2 orchestrates antiviral sexual dimorphism in fish via STING stabilization and viral protein degradation
Source: eLife. 2026 Feb 18;14:RP108048. doi: 10.7554/eLife.108048 (PMC12916102; doi:10.7554/eLife.108048)
Supplement: Figure 2—source data 3. [file elife-108048-fig2-data3.xlsx]

## Sheet: 2B
id	FHK10	FHK11	FHK12	MHK7	MHK8	MHK9
cyp17a2	2.3043	2.26826	1.019	20.9419	26.5592	85.1791
cyp17a1	0.0315713	0	0.0325765	0.0761613	0.171819	0.0662554
cyp26a1	0.0356498	0	0.128747	0.0184286	0.0545668	0.0187036
cyp26b1	1.65094	0.538444	3.69093	0.975347	0.551525	0.824919
sox9a	0.183045	0.113971	0.056662	0.283867	0.0933917	0.537793
sox9b	0.276593	0.129163	0.196212	0.0714902	0.282242	0.74371
dmrt1	0.0100943	0.0251405	0.0208315	0.344396	0.226611	0.0953279
foxl2	0	0	0	0	0	0

## Sheet: 2C
	female					male					n = 5
brain	0.00032	0.000681	0.000263	0.000186	0.000534	0.001298	0.0014	0.00099	0.000788	0.000816	p < 0.0001
heart	5.82e-06	1.04e-05	4.79e-05	5.74e-06	2.14e-05	0.00029	0.00037	0.003852	0.000549	0.000534	p < 0.0001
head-kidney	0.002705	0.001511	0.002152	0.008201	0.002123	0.858565	0.068869	0.041521	0.168404	0.196146	p < 0.0001
gill	1.45e-05	4.24e-07	1.09e-05	2.2e-05	5.1e-05	8.45e-05	0.000788	0.0009486	0.000258	0.000499	p < 0.0001
liver	7.57e-05	3.51e-05	0.00011	8.34e-05	0.000136	0.0034197	0.001054	0.000431	0.00284	0.001532	p < 0.0001
spleen	0.000557	0.00072	0.00162	0.001391	6.02e-05	0.008315	0.000631	0.002577	0.013888	0.003065	p < 0.0001
body-kidney	8.24e-07	1.85e-05	0.000115	1.06e-06	7.51e-05	0.000534	0.000531	0.000383	0.000394	0.000618	p < 0.0001
gonda	0.024518	0.006524	0.014989	0.014782	0.00879	0.297302	0.228458	0.184284	0.34151	0.180491	p < 0.0001
gut	8.63e-05	0.000334	4.2e-05	7.01e-05	1.91e-06	0.000924	5.2e-05	0.000126	0.001362	5.94e-05	p < 0.0001
muscle	7.32e-06	1.79e-05	1.04e-05	0.004187	1.6e-05	0.001511	0.000618	0.00709	0.003308	0.003424	p < 0.0001
skin	1.25e-05	0.000434	2.66e-05	0.000145	4.69e-05	0.000788	6.77e-05	0.00026	0.000411	6.41e-05	p < 0.0001

## Sheet: 2E
Days	cyp17a2+/+ male	cyp17a2-/- male	n = 16	p = 0.009
3	1
4	1
4	1
4	1
4	1
5	0
6	0
7	0
7	0
7	0
7	0
7	0
7	0
7	0
7	0
7	0
2		1
2		1
2		1
2		1
3		1
3		1
3		1
3		1
3		1
3		1
4		1
5		0
6		0
7		0
7		0
7		0

## Sheet: 2F
Liver					Spleen
cyp17a2+/+ male	cyp17a2-/- male	n = 20	p < 0.0001		cyp17a2+/+male	cyp17a2-/-male	n = 20	p < 0.0001
3.38019	7.00145				1.27035	6.0001
1.85256	5.00095				0.467745	2.00182
3.61117	8.10484				1.49094	1.44673
4.82169	1.57997				0.180633	3.36354
1.03749e-05	3.12467				2.77384e-05	3.06517
1.22046	4.55138				0.87347	1.04751
1.01062	1.02079				0.07149	2.11015
0.00442	1.12145				0.28283	1.38761
0.11725	2.864				0.14609	1.66941
0.12762	8.00005				0.154679	1.01099
0.21554	7.01142				0.71275	2.02744
0.2036	2.19368				0.06771	1.17409
0.07925	10.0021				0.01847	4.00191
0.03734	7.67298				0.00481	4.2561
0.10535	5.41996				0.03172	2.00194
0.97851	1.35756				0.53266	1.01236
0.39248	8.1256				0.03693	1.1478
0.33087	10.9962				0.08616	3.18733
0.24206	2.30129				0.06946	7.06619
0.76336	10.0933				0.00246	4.1307

## Sheet: 2G
Liver				Spleen
cyp17a2+/+male	cyp17a2-/-male	n = 20	p < 0.0001	cyp17a2+/+male	cyp17a2-/-male	n = 20	p = 0.0015
0.62818	0.0550145			0.034197	0.002668
0.682177	0.0119768			0.05921	0.0098581
0.167114	0.0207717			0.029564	0.009821
0.901186	0.0740945			0.042986	0.001994
0.124023	0.0285313			0.041235	0.000577
0.132635	0.0929981			0.01323	0.003044
0.4487	0.0232234			0.367	0.00282
0.12869	0.024518			0.012007	0.00911
0.34151	0.05119			0.02977	0.006003
0.456916	0.0632878			0.111105	0.00318
0.164938	0.00573			0.030395	0.00939282
0.535887	0.03082			0.062068	0.0093848
0.411796	0.0618			0.065607	0.00144
0.099442	0.193446			0.02176	0.00951474
0.15822	0.019915			0.0973553	0.00242492
0.55553	0.058315			0.0271527	0.00391135
0.819	0.014989			0.0276321	0.00911413
0.135842	0.021344			0.0381335	0.00648205
0.403321	0.02507			0.168031	0.00436515
0.58315	0.017701			0.0651104	0.00951736
