# Supplementary material for: Male-biased Cyp17a2 orchestrates antiviral sexual dimorphism in fish via STING stabilization and viral protein degradation
Source: eLife. 2026 Feb 18;14:RP108048. doi: 10.7554/eLife.108048 (PMC12916102; doi:10.7554/eLife.108048)
Supplement: Figure 3—figure supplement 1—source data 3. [file elife-108048-fig3-figsupp1-data3.xlsx]

## Sheet: 3A
IFNφ3pro
	Vector		Cyp17a2
Null	60.0803	61.1145	75.6732	78.981	p = 0.043193
poly I:C	480.65	455.47	954.217	974.949	p = 0.029412
SVCV	312.008	323.481	780.149	741.677	p = 0.035836

## Sheet: 3B
ISRE
	Vector		Cyp17a2
Null	2.0512	2.0741	3.9789	4.1456	p = 0.022881
poly I:C	622.92	607.736	1456	1504	p = 0.023249
SVCV	631.399	667.982	1533	1561	p = 0.003045

## Sheet: 3C
IFNφ3pro
	shNC		sh-cyp17a2#2
Null	60.5932	59.659	51.1355	50.5097	p = 0.010551
poly I:C	943.451	919.418	715.991	711.781	p = 0.028984
SVCV	284.239	302.238	180.283	181.62	p = 0.047148

## Sheet: 3D
ISRE
	shNC		sh-cyp17a2#2
Null	7.4821	7.0012	5.14894	5.17202	p = 0.0176709
poly I:C	5261	5257	3067	3076	p = 0.001892
SVCV	3354	3294	2265	2222	p = 0.005008

## Sheet: 3E
vig1
	Vector		Cyp17a2
Null	1	0.0754	4.17821	0.016805	p = 0.001586784856526655
SVCV	929.45	53.279	1713.99	131.609	p = 0.0316758565964328
vig1
	shNC		sh-cyp17a2#2
Null	1	0.04914	0.818307	0.012816	p = 0.02628083636799147
SVCV	179.99	9.89827	41.5773	1.5573	p = 0.019158726880409

## Sheet: 3F
	shNC		shcyp17a2#2
SVCV	6.5	6	8.5	7.9	p = 0.01632
CyHV-2	2.15	1.91	4.06	3.98	p = 0.025579

## Sheet: 3G
	shNC+SVCV		sh-cyp17a2#2+SVCV
g	1	0.0552	0.43138	0.09302	p = 0.0211402602598895
l	1	0.04069	0.3864	0.06383	p = 0.0119983734548671
m	1	0.05055	0.21949	0.03882	p = 0.00478340303097943
n	1	0.04984	0.32522	0.05001	p = 0.000080193069601751
p	1	0.04224	0.44067	0.06795	p = 0.0146210480440884

## Sheet: 3I
	Vector+SVCV					sh-cyp17a2#2+SVCV
SVCV-N	326.17	307.38	328.66	318.65	304.3	634.35	620.94	615.53	619.07	628.1	p = 0.000001
SVCV-P	273.18	243.73	263.4	283.11	251.23	648.11	622.55	648.72	647.86	644.18	p < 0.000001
