# Supplementary material for: Male-biased Cyp17a2 orchestrates antiviral sexual dimorphism in fish via STING stabilization and viral protein degradation
Source: eLife. 2026 Feb 18;14:RP108048. doi: 10.7554/eLife.108048 (PMC12916102; doi:10.7554/eLife.108048)
Supplement: Figure 3—source data 3. [file elife-108048-fig3-data3.xlsx]

## Sheet: 3A
	Vector		Cyp17a2
Null	5.973	5.5691	8.4149	8.3446	p < 0.0001
poly I:C	69.3471	63.178	128.568	131.598	p < 0.0001
SVCV	66.192	67.6799	103.249	109.973	p < 0.0001

## Sheet: 3B
	shNC		sh-cyp17a2#1		sh-cyp17a2#2
Null	1	0.05809	0.87905	0.053148	0.806921	0.034226
poly I:C	5.36726	0.045357	3.18179	0.019478	2.18316	0.036361	p = 0.00376905496684767	p = 0.000899314756773802
SVCV	3.08931	0.06085	1.93165	0.0203	1.2327	0.01456	p = 0.0111450606538614	p = 0.00793462957398609

## Sheet: 3E
	shNC		sh-cyp17a2#2
Null	1.2777	1.2982	0.80863	0.81263	p < 0.0001
poly I:C	53.4056	49.9493	28.3728	27.4413	p < 0.0001
SVCV	25.5715	27.2503	13.8884	14.1491	p < 0.0001

## Sheet: 3G
	Vector		Cyp17a2
Null	1	0.065513	2.10177	0.033735	p = 0.00917836572279777
SVCV	3284.92	156.092	4796.6	125.568	p = 0.00642631705237957
	shNC		sh-cyp17a2#2
Null	1	0.04504	0.83771	0.04887	p = 0.00751063287892235
SVCV	5429.45	399.421	885.258	4.79861	p = 0.0275731491169008

## Sheet: 3H
	Vector			Cyp17a2
SVCV	8.19	8.15	7.74	2.5	2.5	3.19	p = 0.0024680200470095
CyHV-2	2.63	2.63	1.91	1.67	1.67	1.19	p = 0.00408170093291223

## Sheet: 3I
	Vector+SVCV		Cyp17a2+SVCV
g	1	0.06386	0.43138	0.09302	p = 0.0163092969245621
l	1	0.07128	0.3864	0.06383	p = 0.00386455693491085
m	1	0.010985	0.21949	0.03882	p = 0.0113469428610266
n	1	0.011087	0.32522	0.05001	p = 0.0183405879064722
p	1	0.06994	0.44067	0.06795	p = 0.00113248708421823

## Sheet: 3K
	Vector+SVCV					Cyp17a2+SVCV
SVCV-N	566.62	490.66	531.53	514.85	524.12	252.03	256.7	264.87	269.74	287.48	p = 0.000065
SVCV-P	460.36	408.39	462.97	420.18	441.99	190.31	172.44	195.84	174.53	180.96	p = 0.000003
