# Supplementary material for: Male-biased Cyp17a2 orchestrates antiviral sexual dimorphism in fish via STING stabilization and viral protein degradation
Source: eLife. 2026 Feb 18;14:RP108048. doi: 10.7554/eLife.108048 (PMC12916102; doi:10.7554/eLife.108048)
Supplement: Figure 4—figure supplement 1—source data 3. [file elife-108048-fig4-figsupp1-data3.xlsx]

## Sheet: 4A
Cyp17a2-GFP+mCherry	Cyp17a2-GFP+STING-mCherry	Cyp17a2-GFP+STING-TM-mCherry	Cyp17a2-GFP+STING-ΔTM-mCherry
0.4018	0.8972	0.8844	0.4444
0.4085	0.8991	0.8919	0.4589
0.4455	0.8674	0.9179	0.4847
	p = 0.0025	p < 0.0001

## Sheet: 4B
STING-mCherry+Vector					STING-mCherry+Cyp17a2
45.06	36.56	46.21	47.84	40.15	142.71	149.12	154.57	172.88	143.66
	p = 0.000019
