# Supplementary material for: Male-biased Cyp17a2 orchestrates antiviral sexual dimorphism in fish via STING stabilization and viral protein degradation
Source: eLife. 2026 Feb 18;14:RP108048. doi: 10.7554/eLife.108048 (PMC12916102; doi:10.7554/eLife.108048)
Supplement: Figure 4—source data 3. [file elife-108048-fig4-data3.xlsx]

## Sheet: 4F
	Green-Cyp17a2	Red-DsRed-N1			Green-Cyp17a2	Red-ER
0.274183	665.26	823.656		0	783.187	704.857
0.31988	613.596	863.003		0.045367	780.496	713.667
0.365577	649.701	848.711		0.090733	756.242	643.067
0.411274	641.541	913.999		0.1361	1252.96	1095.18
0.456971	625.128	896.571		0.181466	765.505	712.208
0.502668	616.575	867.087		0.226833	703.149	605.614
0.548365	587.846	844.613		0.272199	638.551	482.602
0.594062	548.848	868.905		0.317566	735.026	671.344
0.639759	625.543	790.021		0.362932	788.983	733.91
0.685456	748.156	907.599		0.408299	719.282	760.455
0.731153	950.921	1120.84		0.453665	668.508	589.321
0.776851	875.01	670.774		0.499032	671.346	797.79
0.822548	782.259	955.152		0.544398	576.645	677.265
0.868245	808.694	678.088		0.589765	520.127	618.015
0.913942	655.464	557.556		0.635131	569.907	655.034
0.959639	664.337	555.932		0.680498	637.521	739.804
1.00534	718.461	499.643		0.725864	532.756	674.942
1.05103	862.997	465.841		0.771231	751.343	850.34
1.09673	776.046	874.149		0.816597	858.791	949.284
1.14243	844.918	890.682		0.861964	712.188	808.053
1.18812	803.695	670.118		0.90733	726.901	667.806
1.23382	641.483	670.284		0.952697	822.241	758.744
1.27952	694.775	734.442		0.998063	960.746	812.214
1.32522	765.826	708.779		1.04343	1000.51	877.576
1.37091	728.717	504.111		1.0888	941.097	885.439
1.41661	677.918	587.465		1.13416	598.216	706.781
1.46231	747.124	497.021		1.17953	1159.36	1016.45
1.508	652.966	460.334		1.2249	975.909	907.011
1.5537	665.608	478.832		1.27026	845.491	718.662
1.5994	586.419	389.59		1.31563	706.375	660.677
1.64509	804.075	443.96		1.36099	1042.67	929.797
1.69079	883.151	526.745		1.40636	1007.84	1145.59
1.73649	788.643	525.363		1.45173	966.73	898.857
1.78219	838.996	718.056		1.4971	912.399	783.38
1.82788	692.331	486.222		1.54246	849.095	734.141
1.87358	610.822	444.864		1.58783	976.599	833.605
1.91928	659.804	561.27		1.63319	800.395	693.436
1.96497	891.135	570.711		1.67856	680.29	587.5
2.01067	783.091	456.928		1.72393	864.855	744.105
2.05637	789.022	382.854		1.76929	868.311	785.218
2.10207	754.928	460.941		1.81466	622.263	736.351
2.14776	793.05	585.933		1.86003	714.046	641.816
2.19346	873.347	420.663		1.90539	567.405	518.378
2.23916	917.007	580.318		1.95076	812.478	843.441
2.28485	1007.9	688.226		1.99613	680.752	584.275
2.33055	1030.42	571.713		2.04149	587.651	497.734
2.37625	1074.7	507.578		2.08686	717.507	640.579
2.42195	936.687	657.112		2.13223	878.136	721.995
2.46764	1075.33	711.471		2.17759	714.766	680.331
2.51334	1375.05	655.246		2.22296	673.343	664.519
2.55904	1293.08	665.596		2.26833	666.229	619.136
2.60473	1204.55	679.865		2.31369	601.239	618.893
2.65043	1081.53	733.66		2.35906	629.158	620.82
2.69613	1330.83	577.874		2.40442	769.801	765.838
2.74183	1418.34	655.661		2.44979	712.427	685.415
2.78752	1502.65	582.244		2.49516	640.343	662.217
2.83322	1398.76	905.235		2.54053	706.828	656.255
2.87892	1423.13	576.675		2.58589	818.15	744.28
2.92461	1251.39	535.486		2.63126	833.267	855.908
2.97031	1237.29	717.416		2.67662	722.631	789.14
3.01601	1096.12	704.373		2.72199	1163.36	1105.8
3.0617	1115.02	544.097		2.76736	1133.86	1111.51
3.1074	808.469	657.637		2.81272	1188.4	1019.55
3.1531	934.239	728.8		2.85809	896.786	882.287
3.1988	1013.04	674.644		2.90346	930.096	974.804
3.24449	1024.9	413.327		2.94882	990.33	914.681
3.29019	839.657	674.431		2.99419	948.162	836.069
3.33589	853.956	705.02		3.03956	1012.73	917.194
3.38158	850.084	637.608		3.08492	1030.4	1045.88
3.42728	839.516	592.854		3.13029	1021.05	979.688
3.47298	906.778	704.565		3.17566	965.853	858.658
3.51868	918.207	760.276		3.22102	936.184	917.172
3.56437	1108.93	406.472		3.26639	807.514	701.423
3.61007	1122.66	632.673		3.31175	804.895	696.096
3.65577	1224.67	730.87		3.35712	705.804	628.742
3.70146	1020.61	747.89		3.40249	697.421	677.557
3.74716	1358.64	452.958		3.44786	614.859	504.122
3.79286	1300.58	462.205		3.49322	745.648	618.342
3.83856	1172.79	596.702		3.53859	645.107	430.591
3.88425	1194.42	521.911		3.58395	541.719	471.249
3.92995	1144.26	718.065		3.62932	405.074	365.68
3.97565	1034.7	749.162		3.67469	561.915	477.347
4.02134	1069.46	682.601		3.72005	502.704	478.507
4.06704	1201.24	560.229		3.76542	654.661	516.296
4.11274	1162.5	557.968		3.81079	619.516	518.986
4.15843	1080.43	584.644		3.85615	566.108	554.949
4.20413	1366.82	677.181		3.90152	631.518	528.408
				3.94689	690.707	745.206
				3.99225	801.91	736.296
				4.03762	612.421	670.411
				4.08299	676.481	647.832
				4.12835	618.461	649.953
				4.17372	454.042	495.307
				4.21909	620.395	594.176

## Sheet: 4G
	Green-Cyp17a2	Red-mCherry			Green-Cyp17a2	Red-STING			Green-Cyp17a2	Red-STING-TM			Green-Cyp17a2	Red-STING-ΔTM
0	528.747	969.914		0	921.563	819.841		0	149.055	131.631		0	1330.44	545.347
0.045373	579.278	829.394		0.045569	735.604	943.725		0.04569	117.091	138.02		0.045537	1319.54	638.717
0.090746	638.056	840.51		0.091138	751.205	520.82		0.09138	188.754	224.754		0.091074	1536.78	670.659
0.13612	599.266	838.736		0.136707	762.858	684.78		0.137071	327.191	370.935		0.136611	1484.81	669.145
0.181493	585.724	1033.06		0.182276	797.518	694.836		0.182761	411.584	599.216		0.182147	1789.61	624.893
0.226866	689.837	932.401		0.227845	850.168	610.954		0.228451	653.279	793.32		0.227684	1889.13	784.48
0.272239	959.886	814.732		0.273414	1073.56	808.747		0.274141	696.077	878.051		0.273221	1615.71	596.62
0.317612	1025.72	760.042		0.318983	1509.16	1291.19		0.319831	665.816	859.495		0.318758	1554.6	629.288
0.362986	1116.65	768.563		0.364551	1509.28	1280.13		0.365521	863.701	1082.99		0.364295	1472.46	660.705
0.408359	1038.71	682.682		0.41012	813.331	680.669		0.411212	638.106	885.387		0.409832	1550.8	725.484
0.453732	1038.11	582.133		0.455689	1073.93	891.685		0.456902	737.314	940.116		0.455369	1461.74	834.502
0.499105	1010.96	738.308		0.501258	1978.31	1651.87		0.502592	666.413	924.475		0.500905	1282.38	677.299
0.544478	845.699	871.144		0.546827	1740.88	1524.13		0.548282	808.117	1083.17		0.546442	1052.32	826.09
0.589852	1151.97	710.173		0.592396	1098.65	919.262		0.593972	1038.05	1180.76		0.591979	941.893	776.844
0.635225	795.895	1050.19		0.637965	1265.2	1301.23		0.639662	1047.6	1209.99		0.637516	1014.39	596.63
0.680598	626.116	919.955		0.683534	1310.15	1540.71		0.685353	1253.03	1431.79		0.683053	885.218	616.774
0.725971	607.853	1148.09		0.729103	1339.56	1275.55		0.731043	1606.81	1559.11		0.72859	971.503	555.367
0.771344	878.078	589.221		0.774672	1710.76	1430.55		0.776733	1282.86	1536.43		0.774126	869.992	664.802
0.816718	732.036	558.517		0.820241	946.998	703.381		0.822423	1338.63	1623.95		0.819663	1162.3	781.123
0.862091	848.202	1011.75		0.86581	2120.19	1919.35		0.868113	1247.34	1579.87		0.8652	1153.55	514.542
0.907464	394.141	773.983		0.911379	1731.13	1463.49		0.913803	1180.32	1335.27		0.910737	880.08	712.111
0.952837	737.114	1063.95		0.956948	932.607	702.648		0.959494	1127.63	1377.71		0.956274	1078.96	741.164
0.99821	842.636	628.171		1.00252	867.025	794.641		1.00518	1180.89	1381.83		1.00181	1358.05	771.409
1.04358	718.363	623.903		1.04808	1059.39	854.344		1.05087	1247.43	1435.43		1.04735	1427.77	523.533
1.08896	922.459	801.381		1.09365	956.329	791.063		1.09656	816.743	1000.52		1.09288	1595.01	649.318
1.13433	989.038	807.184		1.13922	1357.81	1197.14		1.14225	1159.71	1352.3		1.13842	1560.84	604.985
1.1797	1398.89	944.557		1.18479	1021.86	862.302		1.18794	1403.88	1554.82		1.18396	1302.25	774.212
1.22508	1171.56	683.81		1.23036	1056.9	824.725		1.23364	1131.31	1427.37		1.2295	1923.79	665.198
1.27045	1280.04	524.585		1.27593	1186.47	940.436		1.27933	1363.56	1408.44		1.27503	1677.16	801.919
1.31582	1316.72	749.596		1.3215	1338.7	1109.53		1.32502	1381.9	1765.21		1.32057	1651.66	850.866
1.3612	1327.84	549.683		1.36707	991.458	838.708		1.37071	1168.79	1578.7		1.36611	1564.61	761.516
1.40657	1442.39	540.906		1.41264	892.646	941.047		1.4164	1513.81	1810.74		1.41164	1790.97	714.503
1.45194	1788.26	1037.33		1.45821	1145.64	925.085		1.46209	1406.32	1627.18		1.45718	1838.72	714.382
1.49731	1686.85	857.729		1.50378	1129.4	1197.18		1.50778	853.281	1027.6		1.50272	1854.67	859.598
1.54269	1090.29	625.624		1.54934	1464.57	1161.33		1.55347	1224.91	1510.17		1.54825	1681.3	732.416
1.58806	1427.81	1010.98		1.59491	1958	1665.31		1.59916	1365.67	1466.1		1.59379	1661.41	670.143
1.63343	1854.1	511.815		1.64048	1650.7	1528.06		1.64485	1134.5	1192.46		1.63933	2050.59	883.31
1.67881	1878.67	1023.5		1.68605	1478.44	1234.66		1.69054	1564.8	1707.02		1.68486	1829.39	935.233
1.72418	1995.58	866.429		1.73162	1806.48	1655.14		1.73623	1487.03	1436.35		1.7304	2294.51	708.078
1.76955	1515.31	919.284		1.77719	1996.6	1524.34		1.78192	1565.84	1382.33		1.77594	2208.66	882.927
1.81493	1230.34	964.687		1.82276	1841.89	1692.44		1.82761	1541.22	1716.19		1.82147	2174.18	886.378
1.8603	1350.43	736.778		1.86833	1596.48	1380.77		1.8733	1739.94	1970.82		1.86701	2318.2	711.128
1.90567	1552.59	1141.3		1.91389	1504.83	1641.75		1.91899	1763.75	1904.43		1.91255	2328.94	611.969
1.95105	1234.85	1174.16		1.95946	1783.2	1619.7		1.96468	1459.05	1581.51		1.95809	2331.06	850.633
1.99642	1780.97	1234.22		2.00503	1629.97	1511.06		2.01037	1697.39	1710.37		2.00362	2172.4	996.232
2.04179	1614.23	1243.5		2.0506	1728.28	1461.84		2.05606	1734.3	1538.78		2.04916	1925.43	615.981
2.08717	1690.69	1139.98		2.09617	1975.46	1593.91		2.10175	1331.43	1509.86		2.0947	2198.05	867.375
2.13254	2016.6	1038.23		2.14174	2018.15	1791.08		2.14744	1261.69	1469.75		2.14023	1836.29	690.761
2.17791	1957.81	986.273		2.18731	1661.76	1971.21		2.19313	1255.15	1261.01		2.18577	1700.9	527.465
2.22329	1753.03	965.46		2.23288	1611.43	1789.42		2.23882	1349.67	1128.48		2.23131	1560.56	587.29
2.26866	1833.01	1216.05		2.27845	1487.62	1680.42		2.28451	1217.88	1396.99		2.27684	1080.78	727.473
2.31403	2120.04	990.288		2.32402	1438.9	1766.84		2.3302	1153.66	1402.91		2.32238	1175.49	817.171
2.35941	2094.36	1026.75		2.36958	1928.09	1437.68		2.37589	1335.78	1504.46		2.36792	1118.13	914.589
2.40478	2064	981.232		2.41515	1881.74	1616.36		2.42158	1525.93	1565.95		2.41345	1278.73	671.01
2.45015	1805.28	1219.59		2.46072	2025.17	1828.62		2.46727	1684.74	1872.41		2.45899	1184.56	754.721
2.49553	2154.63	1183.89		2.50629	2022.9	1844.51		2.51296	1714.53	1607.7		2.50453	1252.64	844.764
2.5409	2095.14	1184.12		2.55186	1719.83	1810.42		2.55865	1352.18	1562.46		2.55006	1350.16	664.701
2.58627	2129.39	1169.2		2.59743	2246.58	1949.64		2.60434	1531.66	1528.58		2.5956	1360.27	597.282
2.63164	2066.04	1069.34		2.643	1958.19	1766.32		2.65003	1299.14	1474.25		2.64114	1319.64	783.042
2.67702	1717.58	1207.31		2.68857	1945.55	1762.1		2.69572	1456.68	1637.44		2.68667	1291.78	609.449
2.72239	1913.01	1044.13		2.73414	1844.37	2205.36		2.74141	1325.47	1526.37		2.73221	1440.38	740.141
2.76776	1651.28	1223.15		2.7797	2211.94	1819.33		2.7871	1363.22	1575.11		2.77775	1584.81	757.966
2.81314	1547.55	1087		2.82527	1910.51	1694.52		2.83279	1259.8	1585.6		2.82328	1834.06	876.184
2.85851	1604.12	948.551		2.87084	1298.83	1421.58		2.87848	1252.74	1573.67		2.86882	1825.76	843.421
2.90388	1448.76	1069.3		2.91641	1107.1	1380.32		2.92417	1374.07	1688.72		2.91436	1522.37	865.2
2.94926	1320.72	1025.33		2.96198	1318.77	1470.66		2.96986	1178.95	1331.15		2.95989	1539.33	932.648
2.99463	1680.26	943.101		3.00755	1730.39	1781.49		3.01555	1142.47	1369.11		3.00543	1711.09	1031.95
3.04	1489.04	1155.62		3.05312	2067.22	1814.7		3.06124	1057.18	1323.07		3.05097	1581.03	1089.9
3.08538	1330.8	960.029		3.09869	2354.95	2151.53		3.10693	1301.03	1521.73		3.09651	1647.82	855.424
3.13075	1437.59	1103.4		3.14426	2305.3	2440.02		3.15262	976.347	1136.16		3.14204	1688.39	592.403
3.17612	1441.18	1137.49		3.18982	2031.65	2111.68		3.19831	999.597	1146.6		3.18758	1734.34	693.655
3.2215	1200.81	1102.68		3.23539	1529.62	1854.37		3.244	1323.24	1462.41		3.23312	1616.89	672.216
3.26687	1178.41	1138.04		3.28096	1671.39	2035.02		3.28969	1221.19	1605.53		3.27865	1610.02	627.835
3.31224	1214.41	1074.14		3.32653	1751.48	1696.78		3.33538	1184.78	1429.5		3.32419	1495.23	679.234
3.35762	1179.25	1056.22		3.3721	1683.01	1466.53		3.38107	951.284	1283.54		3.36973	1956.65	613.886
3.40299	901.296	1197.62		3.41767	1438.52	1159.26		3.42676	1156.37	1432.72		3.41526	1844.68	736.26
3.44836	837.037	1208.36		3.46324	1514.48	1012.14		3.47245	1217.49	1469.55		3.4608	1799.64	602.785
3.49374	1432.2	916.163		3.50881	1523.1	1492.88		3.51814	1190.17	1590.03		3.50634	1784.4	776.607
3.53911	1463.27	1156.06		3.55438	1414.23	1418.76		3.56383	1327.18	1335.68		3.55187	1624.82	709.333
3.58448	1634.51	1380.15		3.59994	1374.71	1193.6		3.60952	1303.51	1539.17
3.62986	1053.65	1515.27		3.64551	1304.31	1196.39		3.65521	1183.2	1703.01
3.67523	1148.49	1472.4		3.69108	1419.61	1283.75		3.7009	1106.55	1615.94
3.7206	1655.66	1285.75		3.73665	1244.37	1101.23		3.74659	1102.77	1432.54
3.76598	1298.31	1656.75		3.78222	1817.27	1645.98		3.79228	1047.9	1340.94
3.81135	1464.58	1179.15		3.82779	2064.84	1711.72		3.83798	1343.17	1482.76
3.85672	1628.65	1208.04		3.85672	1628.65	1308.04		3.88367	1452.97	1595.4
3.9021	1144.39	1516.4		3.9021	1144.39	1316.4		3.92936	1814.51	2108.11
3.94747	1037.22	1456.33		3.94747	1037.22	1356.33		3.97505	1584.75	1615.4
3.99284	886.98	1208.11		3.99284	886.98	1108.11		4.02074	1369.03	1609.34
4.03821	1024.38	1204.28		4.03821	1024.38	1204.28		4.06642	1321.01	1529.64
4.08359	840.207	1277.57		4.08359	840.207	1277.57		4.11212	1740.68	1951.78
4.12896	1161.91	1494.15		4.12896	1161.91	1494.15		4.15781	1489.27	1686.26
4.17433	1138.72	1632.1		4.17433	1138.72	1332.1		4.2035	1600.07	1886.28
4.21971	1059.26	1224.71		4.21971	1059.26	1224.71		4.24919	1625.35	1593.15
4.26508	909.21	1152.26		4.26508	909.21	1152.26		4.29488	1935.7	1750.85
4.31045	1270.23	980.563		4.31045	1270.23	980.563		4.34057	2144.02	2719.51
4.35583	1381.16	1033.43		4.35583	1381.16	1033.43		4.38626	1643.33	2399.22
4.4012	1445.8	1254.9		4.4012	1445.8	1254.9		4.43195	1668.41	2150.05
4.44657	1610.43	1312.01		4.44657	1610.43	1312.01		4.47764	1700.02	2312.44
4.49195	1126.75	1311.69		4.49195	1126.75	1311.69		4.52333	2365.68	2137.42
4.53732	971.056	1195.27		4.53732	971.056	1195.27		4.56902	2287.91	2499.92
4.58269	930.116	1144.57		4.58269	930.116	1144.57
4.62807	833.047	1521.89		4.62807	833.047	721.895
4.67344	1000.99	1402.1		4.67344	1000.99	1202.1
4.71881	1098.86	1492.16		4.71881	1098.86	1292.16
4.76419	1197.77	1423.24		4.76419	1197.77	1323.24
4.80956	1316	1459.77		4.80956	1316	1459.77
4.85493	1328.05	1138.39		4.85493	1328.05	1138.39
4.90031	1378.47	1279.64		4.90031	1378.47	1279.64
4.94568	1477.07	1073.93		4.94568	1477.07	1073.93
4.99105	1292.11	1567.88		4.99105	1292.11	1567.88
5.03643	1160.67	1592.85		5.03643	1160.67	1492.85
5.0818	1395.79	906.837		5.0818	1395.79	1106.84
5.12717	1703.11	1183.79		5.12717	1703.11	1483.79
5.17254	1771.49	1064.55		5.17254	1771.49	1464.55
5.21792	1435.71	1249.9		5.21792	1435.71	1249.9
5.26329	1085.84	1299.16		5.26329	1085.84	1299.16
5.30866	1344.04	1043.66		5.30866	1344.04	1043.66
5.35404	1348.68	1503.31		5.35404	1348.68	1503.31
5.39941	1136.1	1414.78		5.39941	1136.1	1314.78
5.44478	1147.5	1387.5		5.44478	1147.5	1387.5
5.49016	1534.89	947.586		5.49016	1534.89	1347.59
5.53553	1174.47	1432.95		5.53553	1174.47	1432.95
5.5809	961.242	1284.91		5.5809	961.242	1084.91
5.62628	932.236	1269.1		5.62628	932.236	1069.1

## Sheet: 4H
	Vector		Cyp17a2
Null	1	0.11366	0.73898	0.0564
SVCV	5.21641	0.40983	4.97916	0.43834
