# Supplementary material for: Male-biased Cyp17a2 orchestrates antiviral sexual dimorphism in fish via STING stabilization and viral protein degradation
Source: eLife. 2026 Feb 18;14:RP108048. doi: 10.7554/eLife.108048 (PMC12916102; doi:10.7554/eLife.108048)
Supplement: Figure 5—figure supplement 1—source data 3. [file elife-108048-fig5-figsupp1-data3.xlsx]

## Sheet: 5A
	Vector		Cyp17a2
Control	0.7908	0.7077	1.2354	1.2913
STING	70.9116	71.0006	156.751	167.646	p = 0.037653

## Sheet: 5B
	shNC		sh-cyp17a2#2
Control	5.6899	5.5618	5.3406	4.9332
STING	194.735	213.048	154.276	150.999	p = 0.0209492

## Sheet: 5C
	Vector		Cyp17a2
Control	1	0.0518	3.9294	0.41205
STING	15845.5	1399.79	29757.6	2029	p = 0.0143864254752915

## Sheet: 5D
	shNC		sh-cyp17a2#2
Control	1	0.14109	0.96924	0.11453
STING	4021.8	248.432	1908.05	55.3942	p = 0.0289892577030038

## Sheet: 5F
	SVCV					SVCV+STING					SVCV+STING+Cyp17a2
SVCV-N	688	635.99	660	665	640	129	111.9	131	127.96	123.87	68.26	67.67	66.28	61.23	68.34
SVCV-P	718.37	724.68	723.89	729.6	729.92	219.39	212.26	222.87	219.39	224.84	124.12	115.9	113.75	133.33	122.62
SVCV-N						p < 0.000001					p = 0.000131
SVCV-P						p < 0.000001					p = 0.000014

## Sheet: 5I
	Vector+shNC					Cyp17a2+shNC					Vector+sh-sting#2					Cyp17a2+sh-sting#2
SVCV-N	367.11	351.42	378.31	384.47	376.71	115.71	112.27	108.68	107.19	114.93	435.57	439.75	440.04	441.78	444.22	344.62	336.96	345.15	338.14	345.01
						p = 0.000003											p = 0.000002
