# Supplementary material for: Male-biased Cyp17a2 orchestrates antiviral sexual dimorphism in fish via STING stabilization and viral protein degradation
Source: eLife. 2026 Feb 18;14:RP108048. doi: 10.7554/eLife.108048 (PMC12916102; doi:10.7554/eLife.108048)
Supplement: Figure 5—source data 3. [file elife-108048-fig5-data3.xlsx]

## Sheet: 5A
	Vector		Cyp17a2
Control	3.437	3.4081	6.1879	6.178	p = 0.000031
STING	623.95	645.521	2726	2785	p = 0.000219

## Sheet: 5B
	shNC		sh-cyp17a2#2
Control	2.7575	2.6272	2.3248	2.4565	p = 0.082739
STING	1704	1764	1428	1398	p = 0.010742

## Sheet: 5C
	Vector		Cyp17a2
Control	1	0.26815	1.65179	0.05518
STING	1118.47	49.2697	2124.73	121.606	p = 0.0228428215865357

## Sheet: 5D
	shNC		sh-cyp17a2#2
Control	1	0.08192	1.04965	0.09618
STING	27.5961	2.34397	16.4489	0.88132	p = 0.0415286023100587

## Sheet: 5E
Vector+Control+SVCV	6.5	5.5	5.5
STING-Flag+Control+SVCV	3.1	3.67	3.15	p = 0.031812
STING-Flag+Cyp17a2+SVCV	2.15	2.19	1.72	p = 0.016809

## Sheet: 5G
	SVCV		SVCV+STING		SVCV+STING+Cyp17a2
l	1	0.01976	0.14274	0.0146	0.08046	0.00559	p = 0.00191594052819013	p = 0.0170332229364703
m	1	0.00735	0.23065	0.0189	0.1184	0.00986	p = 0.00477832328681334	p = 0.0283890318558801
n	1	0.01125	0.14176	0.01233	0.09144	0.00678	p = 0.00040055753124762	p = 0.0113374326849854
p	1	0.069	0.1292	0.01336	0.07	0.00489	p = 0.0203108852981738	p = 0.0116292506738196

## Sheet: 5H
Vector+shNC+SVCV	8.5	8.5	9
Cyp17a2+shNC+SVCV	5.5	5.5	5	p = 0.009852
Vector+sh-sting#2+SVCV	9.5	9	9.5
Cyp17a2+sh-sting#2+SVCV	8.5	8.5	8

## Sheet: 5I
	Vector+shNC		Cyp17a2+shNC		Vector+sh-sting#2		Cyp17a2+sh-sting#2
n	1	0.08333	0.53853	0.02923	1.21636	0.03265	1.1147	0.01879	p = 0.0371471969009581
p	1	0.08246	0.68337	0.03446	1.20056	0.08031	1.13854	0.02493	p = 0.0478900249528789
