# Supplementary material for: Male-biased Cyp17a2 orchestrates antiviral sexual dimorphism in fish via STING stabilization and viral protein degradation
Source: eLife. 2026 Feb 18;14:RP108048. doi: 10.7554/eLife.108048 (PMC12916102; doi:10.7554/eLife.108048)
Supplement: Figure 6—figure supplement 1—source data 3. [file elife-108048-fig6-figsupp1-data3.xlsx]

## Sheet: 6E
	STING+Vector		STING+Cyp17a2
sh-NC	60.1894	60.1434	128.361	119.658	p = 0.043097
sh-btr32#2	57.7995	58.0466	68.1299	66.0567	p = 0.0480115

## Sheet: 6F
	STING+Vector		STING+Cyp17a2
sh-NC	1	0.04875	2.15185	0.11637	p = 0.0186651378348845
sh-btr32#2	1.05058	0.03366	1.17494	0.05208
