# Supplementary material for: Male-biased Cyp17a2 orchestrates antiviral sexual dimorphism in fish via STING stabilization and viral protein degradation
Source: eLife. 2026 Feb 18;14:RP108048. doi: 10.7554/eLife.108048 (PMC12916102; doi:10.7554/eLife.108048)
Supplement: Figure 6—source data 3. [file elife-108048-fig6-data3.xlsx]

## Sheet: 6H
		Green-btr32	Red-N1			Green-btr32	Red-ER
	0	1397.58	647.264		0	2291.11	1960.13
	0.045667	1478.6	759.236		0.045374	2368.11	1935.67
	0.091334	1769.31	790.758		0.090747	2179.77	1974.62
	0.137	1972.8	614.441		0.136121	1985.55	1844.49
	0.182667	1636.2	691.458		0.181495	1838.05	1748.24
	0.228334	2189.21	531.957		0.226869	1916.48	1905.5
	0.274001	1969.82	543.369		0.272242	1695.89	1688.55
	0.319667	1492.88	615.184		0.317616	1724.27	1996.2
	0.365334	1607.06	684.455		0.36299	2328.95	2465.36
	0.411001	1823.12	343.861		0.408363	2923.24	2703.75
	0.456668	1340.76	599.808		0.453737	2510.91	2287.55
	0.502334	1675.81	700.576		0.499111	2309.43	2289.84
	0.548001	1558.69	579.386		0.544484	2517.05	2309.43
	0.593668	1731.48	359.509		0.589858	2228.51	1929.82
	0.639335	1535.02	490.104		0.635232	2044.73	2239.96
	0.685001	1158.6	533.918		0.680606	2300.41	2429.22
	0.730668	1672.9	577.506		0.725979	1536.36	1562.66
	0.776335	1423.84	591.286		0.771353	1546.94	1510.64
	0.822002	1786.06	606.877		0.816727	2364.04	2321.7
	0.867668	1742.65	408.574		0.8621	1832.98	1999.4
	0.913335	1402.4	848.625		0.907474	1462.25	1515.39
	0.959002	1301.02	698.147		0.952848	1517.11	1502.67
	1.00467	1391.87	453.91		0.998221	1873.72	1779.73
	1.05034	1698.54	372.304		1.0436	2099.56	2161.38
	1.096	2587.42	387.824		1.08897	2490.14	2342.53
	1.14167	2423.33	434.364		1.13434	1996.4	1729.45
	1.18734	2273.9	505.39		1.17972	1780.36	1589.62
	1.233	1692.6	466.209		1.22509	1515.15	1356.79
	1.27867	1415.48	378.259		1.27046	2350.11	2552.71
	1.32434	1752.43	374.139		1.31584	2179.93	1945.19
	1.37	1894.97	379.871		1.36121	1794.1	2062.76
	1.41567	1917.98	527.199		1.40658	1941.5	2182.86
	1.46134	1430.94	564.779		1.45196	2249.82	2456.32
	1.507	1819.13	1010.36		1.49733	2763.21	2317.17
	1.55267	1706.59	811.656		1.54271	2381.55	2197.93
	1.59834	1196.91	438.688		1.58808	2041.5	2130.16
	1.644	2028.06	655.459		1.63345	2522.96	2091.55
	1.68967	2178.25	615.621		1.67883	3117	3101.58
	1.73534	1519.89	632.848		1.7242	2630.22	2250.87
	1.781	1525.14	536.082		1.76957	2107.12	1813.25
	1.82667	1517.08	821.558		1.81495	1668.29	1750.99
	1.87234	1858.15	700.011		1.86032	1886.4	1905.42
	1.918	1764.41	797.958		1.90569	2015.48	1993.21
	1.96367	1453.47	654.258		1.95107	2137.29	1937.07
	2.00934	1220.4	855.461		1.99644	2183.91	1961.64
	2.055	1100.9	528.815		2.04182	1899.92	1958.28
	2.10067	974.668	430.734		2.08719	2357.73	2256.93
	2.14634	1431.06	692.508		2.13256	2371.05	2054.09
	2.192	1368.06	578.144		2.17794	3115.2	3028.8
	2.23767	1280.12	582.039		2.22331	2948.35	2829.59
	2.28334	1546.36	462.523		2.26869	3537.3	3144.46
	2.329	1703.32	379.574		2.31406	3043.1	2988.98
	2.37467	1015.82	498.803		2.35943	2323.65	2220.01
	2.42034	1257.87	624.669		2.40481	2176.42	2073.93
	2.46601	1496.88	445.792		2.45018	2221.44	2047.6
	2.51167	1378.19	696.06		2.49555	2411.89	2139.64
	2.55734	1501.75	698.441		2.54093	1981.51	2051.11
	2.60301	1319.16	583.806		2.5863	2170.09	1940.56
	2.64867	1565.94	362.558		2.63167	2643.15	2251.31
	2.69434	1234.32	600.139		2.67705	2315.59	2086.14
	2.74001	1627.37	666.535		2.72242	2384.84	2048.39
	2.78567	1615.52	535.227		2.7678	2250.83	2386.57
	2.83134	1780.84	571.598		2.81317	2501.08	2144.31
	2.87701	1903.91	397.691		2.85854	2396.47	2075.1
	2.92267	1861.44	545.909		2.90392	2077	1946.98
	2.96834	1593	1002.12		2.94929	1844.76	1821.92
	3.01401	1817.8	387.84		2.99466	1783.48	1640.46
	3.05967	2103.75	351.366		3.04004	1240.52	1373.86
	3.10534	1876.65	444.494		3.08541	1169.19	1053.27
	3.15101	1832.47	364.678		3.13078	1146.65	999.517
	3.19667	1665.73	402.759		3.17616	1060.58	958.092
	3.24234	933.13	511.754		3.22153	1099.23	914.243
	3.28801	1427.6	718.203		3.26691	1125.3	989.556
	3.33367	1266.95	704.376		3.31228	1162.68	1000.79
	3.37934	1278.61	486.212		3.35765	1374.35	1012.26
	3.42501	1315.68	453.615		3.40303	1200.25	1026.9
	3.47067	1358.1	372.417		3.4484	1188.89	1085.62
	3.51634	1141.26	428.432		3.49377	1306.97	1157.09
	3.56201	700.757	696.34		3.53915	1047.52	1160.15
	3.60767	776.797	664.677		3.58452	1440.98	1353.46
	3.65334	1136	567.139		3.6299	1605.49	1331.26
	3.69901	1233.77	705.178		3.67527	1564.05	1356.19
	3.74467	1412.09	603.602		3.72064	1277.67	1713.16
	3.79034	1244.17	665.725		3.76602	1178.03	1264.73
	3.83601	1196.36	886.35		3.81139	1407.74	1645.89
					3.85677	1472.51	1764.42
					3.90214	1300.22	1540.09
					3.94751	1436.71	1831.45
					3.99289	1715.66	2035.99
					4.03826	2383.65	2017.53
					4.08363	2485.37	2046.88
					4.12901	2223.63	2029.16
					4.17438	2374.64	2034.83
					4.21975	1917.85	1539.03
					4.26513	1994.38	1633.49
					4.3105	1923.3	1548.46
					4.35588	1792.91	1542.36
					4.40125	2270.87	2480.33
					4.44662	2190.64	1977.22
					4.492	2191.24	1855.13
					4.53737	2214.98	1954.6
					4.58274	2114.68	1877.6
					4.62812	2491.02	2198
					4.67349	2324.63	2164.77

## Sheet: 6I
		Green-btr32	Red-mCherry			Green-btr32	Red-STING			Green-btr32	Red-Cyp17a2
	0	902.404	1338.04		0	993.884	892.825		0	1858.3	1761.83
	0.045339	825.432	1564.7		0.045339	858.912	813.024		0.045544	1664.78	1961.15
	0.090678	860.545	1348.87		0.090678	1259.96	1441.56		0.091089	1713.73	2017.9
	0.136017	889.13	1569.04		0.136017	1521.98	1515.51		0.136633	2055.11	1825.18
	0.181356	833.947	1458.04		0.181356	1267.49	1305.17		0.182178	2189.43	1818.96
	0.226695	693.101	1042.39		0.226695	1336.79	1447.49		0.227722	1934.11	1773.21
	0.272034	1356.76	792.164		0.272034	1331.72	1468.13		0.273266	1801.51	1987.69
	0.317373	883.235	1596.07		0.317373	1007.43	1226.22		0.318811	1948.45	2325.26
	0.362712	917.859	1572.9		0.362712	957.203	1042.4		0.364355	1796.8	1686.21
	0.408051	1031.12	1556.36		0.408051	887.002	1001.24		0.4099	1748.77	1673.91
	0.45339	867.972	1565.27		0.45339	1075.86	1136.78		0.455444	1565.76	1712.19
	0.498729	967.177	1256.67		0.498729	1271.7	1307.77		0.500988	1303.19	1516.07
	0.544068	1035.39	1415.45		0.544068	1230.34	1519.35		0.546533	1472.16	1509.13
	0.589407	1107.56	1528.68		0.589407	1197.21	1422.71		0.592077	1588.09	1516
	0.634746	1293.84	607.802		0.634746	1567.65	1578.93		0.637622	1558.79	1462.33
	0.680085	1397.8	1013.15		0.680085	1747.46	1982.38		0.683166	1892.31	1706.06
	0.725424	1066.96	1568.51		0.725424	1753.84	1948.73		0.72871	2128.68	1851.97
	0.770763	1404.24	1022.43		0.770763	1660.79	1895.12		0.774255	2252.57	1874.04
	0.816102	1198.38	1680.85		0.816102	1420.29	1666.51		0.819799	2000.44	1705.63
	0.861441	1076.96	1508.65		0.861441	1696.43	1931.02		0.865344	1788.93	1784.89
	0.90678	1188.99	771.35		0.90678	1482.89	1739.24		0.910888	1890.84	1566.55
	0.952119	1131.61	790.283		0.952119	1363.9	1629.43		0.956432	1866.85	1663.8
	0.997458	1038.67	757.436		0.997458	1328.51	1340.45		1.00198	1756.23	1855.23
	1.0428	910.353	590.131		1.0428	1389.35	1234.29		1.04752	1821.77	1998.26
	1.08814	841.606	518.023		1.08814	1461.66	1584.85		1.09307	1682.19	1934.88
	1.13348	970.111	586.833		1.13348	1229.5	1143.18		1.13861	1777.32	1713.47
	1.17881	1099.32	538.628		1.17881	1844.16	1946.96		1.18415	1750.28	1606.38
	1.22415	1332.83	850.329		1.22415	1528.6	1645.08		1.2297	1816.38	1889.4
	1.26949	1239.05	802.263		1.26949	831.786	892.095		1.27524	1597.02	1481.38
	1.31483	1796.57	910.037		1.31483	1679.2	1544.95		1.32079	1751.82	1528.81
	1.36017	1698.71	838.844		1.36017	1277.59	1341.71		1.36633	1672.37	1656.63
	1.40551	1727.91	1133.46		1.40551	1026.93	1051.17		1.41188	1431.8	1447.07
	1.45085	1605.77	1029.1		1.45085	1352.97	1609.26		1.45742	1530.84	1489.69
	1.49619	1696.24	1030.94		1.49619	1285.58	1606.92		1.50297	1429.84	1550.3
	1.54153	2426.01	1120.64		1.54153	1413.26	1306.64		1.54851	1117.59	1330.52
	1.58686	2008.03	1113.13		1.58686	1707.42	1911.74		1.59405	1802.45	1414.61
	1.6322	1844.33	1219.57		1.6322	1901.93	1729.89		1.6396	1859.48	1670.22
	1.67754	1752.67	1166.15		1.67754	1732.03	1797.3		1.68514	1431.22	1456.98
	1.72288	2011.3	1100.47		1.72288	1721.09	1516.06		1.73069	1605.36	1379.38
	1.76822	2268.84	1211.29		1.76822	910.393	1102.2		1.77623	1516.13	1446.75
	1.81356	1174.35	1668.55		1.81356	909.429	1128.5		1.82178	1699.22	2034.71
	1.8589	1245.68	652.335		1.8589	1455.66	1574.71		1.86732	1295.79	1452.6
	1.90424	1788.91	1165.78		1.90424	1520.1	1402.72		1.91287	1533.15	1964.38
	1.94958	1815.32	981.16		1.94958	987.078	1151.86		1.95841	1857.31	1682.5
	1.99492	1579.16	974.939		1.99492	1163.79	1373.58		2.00395	2070.83	1613.29
	2.04026	1615.64	1011.22		2.04026	1008.38	1274.4		2.0495	1478.1	1439.79
	2.08559	1539.92	936.211		2.08559	1214.42	1318.65		2.09504	2118.54	1724.84
	2.13093	1775.11	995.12		2.13093	1454.3	1120.17		2.14059	1219.78	1181.24
	2.17627	1417.07	735.494		2.17627	1305.19	953.697		2.18613	1440.02	1301.42
	2.22161	1669.06	974.041		2.22161	1329.33	1039.43		2.23168	2686.81	2409.7
	2.26695	1348.39	879.255		2.26695	1444.31	1369.02		2.27722	1989.7	2402.3
	2.31229	1392.04	824.955		2.31229	922.548	1358.88		2.32276	2023.1	2269.86
	2.35763	1429.99	613.836		2.35763	1333.58	1230.08		2.36831	2135	1804.51
	2.40297	913.456	410.397		2.40297	1545.38	1702.54		2.41385	2045.26	2276.97
	2.44831	1091.3	623.418		2.44831	1576.71	1803.71		2.4594	2240.06	2683.1
	2.49364	1047.31	711.494		2.49364	1315.03	1519.08		2.50494	1792.99	2093.98
	2.53898	672.883	341.76		2.53898	1642.02	1630.97		2.55049	2258.3	1954.41
	2.58432	622.733	358.687		2.58432	1719.89	1948.09		2.59603	2197.45	2353.7
	2.62966	915.815	488.229		2.62966	2155.95	2170.85		2.64158	2025.54	2425.14
	2.675	919.62	437.516		2.675	1956.98	2252.18		2.68712	2246.99	2051.43
	2.72034	728.551	399.487		2.72034	1660.49	1914.89		2.73266	2134.97	2459.68
	2.76568	851.649	561.969		2.76568	2160.11	2259.25		2.77821	2535.99	2950.98
	2.81102	1010.27	688.812		2.81102	2275.95	2416.75		2.82375	2668.97	2533.66
	2.85636	992.435	638.486		2.85636	2037.27	1958.62		2.8693	2470.37	2502.22
	2.9017	1283.37	815.707		2.9017	2249.33	1847.5		2.91484	2314.34	2431.43
	2.94704	1139.83	726.209		2.94704	2232.6	2049.55		2.96039	1956.92	2254.97
	2.99237	1030.83	614.502		2.99237	1289.03	1552.4		3.00593	2181.42	2323.69
	3.03771	1387.68	870.552		3.03771	1359.2	1925.92		3.05147	1729.52	2076.33
	3.08305	1233.4	850.942		3.08305	1770.19	1790.18		3.09702	1755.68	2092.38
	3.12839	1312.39	904.018		3.12839	1764.45	1849.03		3.14256	1912.6	2213.01
	3.17373	1117.61	764.269		3.17373	1714.74	1845.72		3.18811	1772.95	2127.88
	3.21907	1330.77	764.751		3.21907	1596.05	1529.95		3.23365	1986.11	2038.27
	3.26441	1492.71	709.444		3.26441	1376.34	1634.15		3.2792	2008.61	2407.59
	3.30975	1746.92	888.519		3.30975	1713.66	1169.15		3.32474	1929.12	2165.9
	3.35509	1188.1	623.425		3.35509	1817.09	978.516		3.37029	1920.9	2476.71
	3.40042	1029.49	617.76		3.40042	1175.5	1157.29		3.41583	1840.14	2071.57
	3.44576	1157.09	674.251		3.44576	1251.14	1424.26		3.46137	1717.89	2025.42
	3.4911	1141.62	839.856		3.4911	1462.77	1252.08		3.50692	1581.88	1761.76
	3.53644	994.184	805.637		3.53644	1259.94	1261.91		3.55246	2114.85	1928.15
	3.58178	776.089	556.434		3.58178	1184.31	1634.96		3.59801	2407.82	1975.6
	3.62712	1100.06	752.498		3.62712	1399.49	1233.62		3.64355	2561.4	1981.72
	3.67246	1235.15	728.196		3.67246	1173.93	1524.79		3.6891	2142.53	1834.15
									3.73464	1759.52	2145.2
									3.78018	1879.72	2257.78
									3.82573	2154.49	2310.51
									3.87127	2283.38	2552.37
									3.91682	1767.99	2120.55
									3.96236	1960.43	2102.09
									4.00791	1744.11	1843.93
									4.05345	1816.63	1529.77
									4.099	1891.5	1831.66
									4.14454	1827.41	2213.85
									4.19008	2121.95	2492.38
									4.23563	2243.41	2284.03
									4.28117	2177.36	1838.67
									4.32672	1705.09	1599.93
									4.37226	1356.04	1627.5
									4.41781	1316.33	1637.19
									4.46335	1439.72	1682.22
									4.5089	1711.79	1948.58

## Sheet: 6J
	btr32-GFP+mCherry	btr32-GFP+STING-mCherry	btr32-GFP+Cyp17a2-mCherry
	0.3405	0.7985	0.7987
	0.3005	0.7921	0.8459
	0.3404	0.8463	0.8632
		p < 0.0001	p < 0.0001

## Sheet: 6L
	STING+Vector		STING+Cyp17a2
Control	3.9757	3.92183	9.4599	9.0094	p = 0.023873
btr32	6.3396	6.4394	42.5515	41.6801	p = 0.008653

## Sheet: 6M
	STING+Vector		STING+Cyp17a2
Control	1	0.06465	2.1991	0.03054	p = 0.0090523084125148
btr32	1.26337	0.06499	3.93862	0.05808	p = 0.000822172291239089
