# Supplementary material for: Male-biased Cyp17a2 orchestrates antiviral sexual dimorphism in fish via STING stabilization and viral protein degradation
Source: eLife. 2026 Feb 18;14:RP108048. doi: 10.7554/eLife.108048 (PMC12916102; doi:10.7554/eLife.108048)
Supplement: Figure 7—source data 3. [file elife-108048-fig7-data3.xlsx]

## Sheet: 7E
	Vector		Cyp17a2
Control	0.3804	0.376	0.4396	0.5556
STING	64.945	63.9268	152.759	161.77	p = 0.03436
STING-K203R	58.4625	57.4829	58.4663	60.0201

## Sheet: 7F
	Vector		Cyp17a2
Control	1	0.11184	1.0397	0.07277
STING	101.36	2.01069	196.473	3.94453	p = 0.00647096340623336
STING-K203R	58.2675	1.256	54.9644	3.20129
