# Supplementary material for: Male-biased Cyp17a2 orchestrates antiviral sexual dimorphism in fish via STING stabilization and viral protein degradation
Source: eLife. 2026 Feb 18;14:RP108048. doi: 10.7554/eLife.108048 (PMC12916102; doi:10.7554/eLife.108048)
Supplement: Figure 8—source data 3. [file elife-108048-fig8-data3.xlsx]

## Sheet: 8E
	P-mCherry+Vector					P-mCherry+Cyp17a2
	130.44	135.61	131.16	134.14	130.5	15.13	16.55	15.81	15.26	15.78	p < 0.000001

## Sheet: 8F
		Green-GFP	Red-P			Green-Cyp17a2	Red-P
	0	126.13	103.623		0	3408.91	1226.4
	0.045717	127.227	95.1857		0.045544	3566.84	1153.36
	0.091433	140.317	80.2694		0.091089	3689.91	1273.05
	0.13715	132.786	85.4847		0.136633	3851.46	989.233
	0.182867	129.871	96.4808		0.182178	3367.23	990.341
	0.228583	129.181	92.9429		0.227722	3322.21	1466.48
	0.2743	130.854	90.3327		0.273266	3460.35	1113.77
	0.320017	131.618	100.78		0.318811	3682.61	1077.33
	0.365733	119.728	104.831		0.364355	3745.04	888.836
	0.41145	144.917	87.102		0.4099	3237.06	794.228
	0.457167	151.833	79.1341		0.455444	3011.97	800.587
	0.502883	129.453	75.3851		0.500988	2195.72	1114.66
	0.5486	148.103	72.4756		0.546533	1941.56	813.058
	0.594316	140.205	71.9823		0.592077	1970.16	929.546
	0.640033	133.802	68.3498		0.637622	2000.87	1015.14
	0.68575	139.864	76.6856		0.683166	1980.07	1000.76
	0.731466	154.565	82.9059		0.72871	1789.06	1390.32
	0.777183	130.204	79.6189		0.774255	1843.25	1268.21
	0.8229	131.106	89.1239		0.819799	1965.35	1142.78
	0.868616	129.257	82.8016		0.865344	1591.5	1112.65
	0.914333	133.843	78.8935		0.910888	1763.82	1388
	0.96005	120.19	85.5016		0.956432	1619.67	1213.45
	1.00577	135.568	91.1875		1.00198	2150.28	925.07
	1.05148	137.142	84.4615		1.04752	1827.44	903.327
	1.0972	135.42	79.4126		1.09307	1730.74	821.495
	1.14292	147.353	75.5231		1.13861	2224.95	878.407
	1.18863	134.869	85.8838		1.18415	2517.93	1326.22
	1.23435	127.358	80.9089		1.2297	1501.8	1456.4
	1.28007	136.027	75.1797		1.27524	1308.59	1523.66
	1.32578	138.558	74.1124		1.32079	2205.96	1878.65
	1.3715	146.818	84.536		1.36633	1369.25	1282.75
	1.41722	142.59	69.8175		1.41188	1875.35	1798.13
	1.46293	131.55	93.4976		1.45742	1809.38	1981.19
	1.50865	134.299	81.1267		1.50297	2112.67	2034.82
	1.55437	137.828	79.5966		1.54851	3076.67	2931.39
	1.60008	136.041	69.0256		1.59405	2403.43	1898.03
	1.6458	120.252	79.9298		1.6396	2880.09	2960.6
	1.69152	127.904	96.2513		1.68514	2762.92	2913.12
	1.73723	134.926	85.8451		1.73069	2667.68	2728.33
	1.78295	125.245	74.803		1.77623	3438.75	3388.84
	1.82867	140.306	65.7393		1.82178	2750.17	2869.7
	1.87438	137.362	78.4094		1.86732	3460.43	3097.91
	1.9201	123.951	102.06		1.91287	3372.15	3202.14
	1.96582	133.026	96.7178		1.95841	3604.25	3824
	2.01153	141.687	96.9701		2.00395	3076.05	2636.94
	2.05725	131.936	92.4889		2.0495	3543.84	3443.42
	2.10297	121.573	86.736		2.09504	3436.4	3351.94
	2.14868	133.349	72.7508		2.14059	3339.66	3166.26
	2.1944	137.545	92.5853		2.18613	3744.96	3783.2
	2.24012	142.876	88.7309		2.23168	3706.26	3628.3
	2.28583	130.702	89.3962		2.27722	3171.48	2997
	2.33155	135.975	77.8661		2.32276	3769.6	3580.44
	2.37727	132.857	95.3978		2.36831	3397.23	3333.48
	2.42298	125.665	89.0569		2.41385	3593.44	3560.36
	2.4687	139.38	94.2017		2.4594	3841.15	3661.15
	2.51442	145.977	98.0959		2.50494	3647.8	3330.04
	2.56013	140.827	100.371		2.55049	3896.6	3402.04
	2.60585	146.985	89.8082		2.59603	3996.82	3856.54
	2.65157	155.044	95.9483		2.64158	3809.38	3876.2
	2.69728	149.778	87.5695		2.68712	3983.71	3707.18
	2.743	148.363	97.236		2.73266	4090.62	4096.06
	2.78872	136.915	115.119		2.77821	4085.94	2214.38
	2.83443	158.137	86.038		2.82375	3991.29	3726.89
	2.88015	142.668	93.9909		2.8693	3854.04	3649.74
	2.92587	145.957	86.6389		2.91484	4010.4	4398.59
	2.97158	148.139	100.487		2.96039	4034.6	4186.52
	3.0173	151.363	98.9945		3.00593	3901.76	4183.2
	3.06302	152.298	95.6971		3.05147	3504.21	3673.23
	3.10873	148.421	91.2588		3.09702	2788.44	2645.53
	3.15445	141.169	86.7797		3.14256	2708.91	2630.29
	3.20017	141.701	88.076		3.18811	2997.67	3362.2
	3.24588	146.588	90.5904		3.23365	3177.56	3233.5
	3.2916	146.772	76.865		3.2792	3154.92	3259.92
	3.33732	142.901	76.8118		3.32474	3334.93	3497.94
	3.38303	136.915	83.4228		3.37029	3250.82	3414.37
	3.42875	126.758	78.0764		3.41583	3118.99	3245.72
	3.47446	146.133	82.7134		3.46137	3390.2	3345.84
	3.52018	146.995	79.0416		3.50692	2816.16	3038.24
	3.5659	139.795	92.0249		3.55246	2577.42	2068.02
	3.61162	138.287	90.1984		3.59801	3140.77	3389.6
	3.65733	138.817	93.6391		3.64355	3178.48	3379.01
	3.70305	141.971	94.4178		3.6891	2584.39	2212.22
	3.74877	154.624	85.3199		3.73464	2520.66	2233.23
	3.79448	141.743	84.7186		3.78018	2816.46	3157.23
	3.8402	141.351	98.672		3.82573	2512.89	2948.88
	3.88591	137.757	109.821		3.87127	2673.48	3399.84
	3.93163	139.829	95.85		3.91682	2794.29	3297.94
	3.97735	139.091	87.3393		3.96236	2585.8	2917.18
	4.02306	145.204	94.0287		4.00791	2503.7	2020.94
	4.06878	163.602	98.0415		4.05345	2296.21	2338.95
	4.1145	162.576	105.523		4.099	2210.25	2340.17
	4.16021	164.293	91.3798		4.14454	2638.51	2158.07
					4.19008	3161.79	3217.35
					4.23563	2924.27	3194.16
					4.28117	2744.5	2061.83
					4.32672	3321.4	3274.86
					4.37226	3679.46	3495.89
					4.41781	3504.38	3379.61
					4.46335	3186.64	3373.77
					4.5089	3379.94	3302.56
