# Supplementary material for: Male-biased Cyp17a2 orchestrates antiviral sexual dimorphism in fish via STING stabilization and viral protein degradation
Source: eLife. 2026 Feb 18;14:RP108048. doi: 10.7554/eLife.108048 (PMC12916102; doi:10.7554/eLife.108048)
Supplement: Figure 9—figure supplement 1—source data 3. [file elife-108048-fig9-figsupp1-data3.xlsx]

## Sheet: 8B
	USP8-GFP+mCherry	USP8-GFP+Cyp17a2-mCherry	USP8-GFP+P-mCherry
	0.3832	0.7138	0.8797
	0.3731	0.7704	0.9228
	0.3805	0.7366	0.9292
		p < 0.0001	p < 0.0001
