# Supplementary material for: Male-biased Cyp17a2 orchestrates antiviral sexual dimorphism in fish via STING stabilization and viral protein degradation
Source: eLife. 2026 Feb 18;14:RP108048. doi: 10.7554/eLife.108048 (PMC12916102; doi:10.7554/eLife.108048)
Supplement: Figure 9—source data 3. [file elife-108048-fig9-data3.xlsx]

## Sheet: 9D
		Green-USP8	mCherry			Green-USP8	mCherry-Cyp17a2			Green-USP8	mCherry-P
	0	1060.51	625.835		0	1744.23	1744.85		0	1789.41	1769.77
	0.045717	996.92	574.353		0.045667	2235.41	2095.03		0.045802	1979.21	1892.23
	0.091433	853.454	654.346		0.091334	2123.08	2061.09		0.091603	1102.07	1167.26
	0.13715	861.099	630.03		0.137	1922.46	2072.47		0.137405	1414.42	1388.84
	0.182867	1112.91	642.175		0.182667	2061.36	1949.2		0.183207	1235.64	1179.74
	0.228583	1079.3	625.388		0.228334	2459.08	2285.42		0.229008	1242.66	1111.45
	0.2743	1247.03	1006.04		0.274001	1953.73	1828.5		0.27481	1260.69	1116.19
	0.320017	1319.44	900.936		0.319667	1933.75	2064.33		0.320611	1267.14	1123.02
	0.365733	1642.22	1114.45		0.365334	1830.25	1728.03		0.366413	1234.79	1157.78
	0.41145	1729.2	1180.33		0.411001	2084.92	2194.27		0.412215	1280.96	1195.43
	0.457167	1090.5	630.96		0.456668	2208.65	2320.98		0.458016	1357.52	1321.66
	0.502883	1441.23	971.476		0.502334	2134.98	2278.34		0.503818	1552.17	1554.77
	0.5486	1762.37	961.03		0.548001	2364.38	2162.18		0.54962	1642.33	1510.61
	0.594317	1347.37	979.701		0.593668	2422.9	2586.46		0.595421	1434.05	1389.75
	0.640033	1508.66	950.948		0.639335	2368.11	2177.93		0.641223	1493.3	1208.91
	0.68575	1436.52	1043.29		0.685001	2235.33	2028.88		0.687025	1667.95	1468.33
	0.731467	1330.52	904.817		0.730668	2337.69	2148.78		0.732826	1767.28	1471.39
	0.777183	1150.99	783.847		0.776335	2642.84	2585.17		0.778628	1840.23	1702.21
	0.8229	1358.21	999.519		0.822002	2112.67	2039.88		0.824429	1841.08	1670
	0.868617	1417.75	1223.71		0.867668	2204.66	2055.09		0.870231	1864.55	1658.23
	0.914333	1589.96	1107.17		0.913335	2493.26	2284.34		0.916033	1965.07	1886.01
	0.96005	1623.03	1045.53		0.959002	2047.83	2178.28		0.961834	2169.29	1935.95
	1.00577	1614.85	1145.67		1.00467	1811.51	1932.77		1.00764	2124.67	1972.75
	1.05148	1738.44	1113.09		1.05034	1845.16	1947.56		1.05344	2061.03	1854.11
	1.0972	1561.97	1195.68		1.096	1784.55	1686.69		1.09924	1876.17	1621.52
	1.14292	1860.85	1270.8		1.14167	1827.69	1756.44		1.14504	1452.46	1307.73
	1.18863	1578.66	987.627		1.18734	1764.12	1625.13		1.19084	1567.97	1399.85
	1.23435	1686.82	1007.4		1.233	1750.83	1838.18		1.23664	1910.36	1858.66
	1.28007	1462.87	1098.64		1.27867	1544.92	1664.36		1.28245	1698.98	1563.62
	1.32578	1440.78	965.364		1.32434	1418.88	1302.53		1.32825	1368.45	1326.47
	1.3715	1250.01	876.221		1.37	1588.56	1431.17		1.37405	1435.6	1322.75
	1.41722	1207.51	885.379		1.41567	1886.84	1663.64		1.41985	1595.18	1478.56
	1.46293	1472.54	972.744		1.46134	1553.2	1482.57		1.46565	1625.55	1566.68
	1.50865	1444.99	1017.2		1.507	1490.29	1394.02		1.51145	1880.66	1729.74
	1.55437	1194.89	877.934		1.55267	1534.29	1402		1.55726	1739.04	1641.76
	1.60008	1558.09	1049.02		1.59834	1601.33	1495.21		1.60306	1911.04	1832.84
	1.6458	1301.42	950.134		1.644	1379.69	1248.77		1.64886	1868.89	1727.78
	1.69152	1443.21	893.34		1.68967	1682.68	1564.99		1.69466	1860.03	1760.54
	1.73723	1432.62	1007.6		1.73534	1529.15	1440.57		1.74046	1625.88	1554.68
	1.78295	1533.42	1076.52		1.781	1496.21	1331.68		1.78626	1639.75	1588.75
	1.82867	1438.52	811.32		1.82667	1508.98	1470.27		1.83207	1659.14	1593.48
	1.87438	1296.2	916.145		1.87234	1587.53	1447.63		1.87787	1619.24	1533.63
	1.9201	1465.64	1107.96		1.918	1441.36	1367.85		1.92367	1689.87	1553.99
	1.96582	1373.03	981.621		1.96367	1347.86	1207.1		1.96947	1586.92	1485.66
	2.01153	1303.66	989.378		2.00934	1838.04	1710.81		2.01527	1575.07	1551.73
	2.05725	1439.19	826.956		2.055	1923.32	1871.29		2.06107	1494.75	1389.52
	2.10297	1212.49	836.221		2.10067	2201.53	2101.97		2.10688	2053.27	2060.68
	2.14868	1330.42	795.775		2.14634	2195.07	2127.99		2.15268	2004.99	1919.61
	2.1944	1563.51	814.1		2.192	2012.97	2111.65		2.19848	1960.77	1916.62
	2.24012	1645.16	917.161		2.23767	2048.13	2080.47		2.24428	1779.89	1717.2
	2.28583	1123.01	650.915		2.28334	2101.57	2845.28		2.29008	1521.26	1447.05
	2.33155	1382.03	735.009		2.329	2382.87	2590.52		2.33588	1649.87	1537.46
	2.37727	1498.92	850.479		2.37467	2081.97	2515.23		2.38169	2035.17	1993.96
	2.42298	1367.72	804.492		2.42034	2120.02	2842.7		2.42749	1486.81	1346.84
	2.4687	1197.21	1007.62		2.46601	2152.5	3243.66		2.47329	1426.75	1326.12
	2.51442	1505.84	935.641		2.51167	2343.11	2576.49		2.51909	1415.82	1351.71
	2.56013	1339.71	1008.52		2.55734	1975.36	2530.88		2.56489	1154.71	1075.38
	2.60585	1344.08	977.112		2.60301	2180.85	2189.94		2.61069	1368.71	1213.01
	2.65157	1448.6	1159.56		2.64867	1818.7	2500.21		2.6565	1389.3	1216.38
	2.69728	1644.76	1064.31		2.69434	2102.17	2334.44		2.7023	1249.64	1232.04
	2.743	1317.91	959.357		2.74001	2302.84	2400.95		2.7481	1352.95	1201.15
	2.78872	1571.03	973.351		2.78567	1953.95	2830.17		2.7939	1452.53	1329.84
	2.83443	1690.19	971.069		2.83134	1741.59	1929.42		2.8397	1474.74	1318.55
	2.88015	1542.52	1192.45		2.87701	1947.61	2175.8		2.8855	1690.74	1590.41
	2.92587	1494.93	990.676		2.92267	2139.06	2056.18		2.93131	1549.26	1474.61
	2.97158	1551.33	1161.24		2.96834	2217.41	2369.05		2.97711	1649	1561.96
	3.0173	1555.63	1209.44		3.01401	2565.48	2338.61		3.02291	1536.29	1591.59
	3.06302	1536.11	1156.99		3.05967	2102.22	2116.82		3.06871	1754.33	1629.67
	3.10873	1372.56	1077.99		3.10534	2226.73	2400.71		3.11451	1736.05	1694.94
	3.15445	1590.45	1250.62		3.15101	2040.32	2102.59		3.16031	1668.82	1651.53
	3.20017	1516.56	961.482		3.19667	1835.22	2046.56		3.20611	1506.54	1462.87
	3.24588	1460.78	1050.13		3.24234	1897.04	2088.23		3.25192	1594.56	1579.21
	3.2916	1415.38	1167.58		3.28801	2357.86	2510.25		3.29772	1700.32	1626.66
	3.33732	1473.18	1173		3.33367	2434.24	2339.72		3.34352	1928.88	1830.03
	3.38303	1617.14	869.783		3.37934	2102.17	1920.62		3.38932	1752.83	1639.99
	3.42875	1258.5	949.946		3.42501	2582.5	1903.74		3.43512	1954.29	1882.56
	3.47447	1398.29	889.207		3.47067	2476.17	1981.78		3.48092	2025.03	2292.08
	3.52018	1101.42	938.733		3.51634	2303.35	1774.34		3.52673	1934.22	1823.29
	3.5659	1428.27	1045.7		3.56201	2358.8	1692.95		3.57253	1656.62	1560.85
	3.61162	1322.2	737.903		3.60767	2275.95	1844.85		3.61833	1580.92	1501.72
	3.65733	1110.43	781.029		3.65334	2577.21	1832.22		3.66413	1684.15	1640.89
	3.70305	1256.46	841.59		3.69901	2154.43	2335.86		3.70993	1824.26	1822.15
	3.74877	1082.73	761.223		3.74467	2280.07	1968.89		3.75573	1923.91	1845.72
	3.79448	1242.68	729.528		3.79034	2111.08	1871.83		3.80154	2050.24	1955.38
	3.8402	1062.81	775.703		3.83601	1990.04	2279.24		3.84734	1970.24	1974.26
	3.88592	1152.03	802.652						3.89314	2160.73	2046.38
	3.93163	1100.23	875.412						3.93894	1988.5	1906.83
	3.97735	1133	971.037						3.98474	1820.89	1848.17
	4.02307	1295.7	875.414						4.03054	1727.01	1787.55
	4.06878	826.398	1025.05
	4.1145	848.641	1013.87
	4.16022	769.684	1095.44
